# Supplementary material for: Insights into the estimation of capacitance for carbon-based supercapacitors
Source: Royal Society of Chemistry journal article supplement (doi:10.1039/d0ra09837j), 2021-01-01
Supplement: d0ra09837j1.xlsx [file d0ra09837j1.xlsx]

## Sheet: Sheet1
DOI	Materials-1	Materials-2	Materials-note	Electrolyte	Voltage window (V)	Specific surface area (m2/g)	Pore volume (cm3/g)	Pore size (nm)	Micropore volume (cm3/g)	SSA of micropores (m2/g)	Id/Ig	N (at. %)	O (at. %)	B (at. %)	S (at. %)	F (at. %)	P (at. %)	Capacitance (F/g)	GWO-SVM	Relative Deviation (%)
10.1149/1.1921134	CDC			h2so4	0.25	630	0	1.5	0	0	0	0	0	0	0	0	0	80	80.5294	0.00657385
10.1149/1.1921134	CDC			h2so4	0.25	1000	0	1.75	0	0	0	0	0	0	0	0	0	125	110.858	0.12757
10.1149/1.1921134	CDC			h2so4	0.25	1500	0	2.5	0	0	0	0	0	0	0	0	0	175	168.351	0.039495
10.1149/1.1921134	CDC			h2so4	0.25	1400	0	2.9	0	0	0	0	0	0	0	0	0	160	171.821	0.0687988
10.1149/1.1921134	CDC			h2so4	0.25	850	0	1.25	0	0	0	0	0	0	0	0	0	95	86.5504	0.0976265
10.1149/1.1921134	CDC			h2so4	0.25	1800	0	1.15	0	0	0	0	0	0	0	0	0	138	140.564	0.0182411
10.1149/1.1921134	CDC			h2so4	0.25	1700	0	1.25	0	0	0	0	0	0	0	0	0	143	145.399	0.016497
10.1149/1.1921134	CDC			h2so4	0.25	1100	0	1.8	0	0	0	0	0	0	0	0	0	120	144.747	0.170966
10.1002/smll.200500327	MWCNT			teabf4	3.5	20	0.11	0	0.02	0	1.02	0	0	0	0	0	0	35	22.6772	0.543397
10.1002/smll.200500327	MWCNT			teabf4	3.5	73	0.18	0	0.07	0	0.88	0	0	0	0	0	0	0	13.9646	-
10.1002/smll.200500327	MWCNT			teabf4	3.5	111	0.19	0	0.09	0	0.9	0	0	0	0	0	0	0	22.3304	-
10.1002/smll.200500327	MWCNT			teabf4	3.5	156	0.3	0	0.13	0	0.85	0	0	0	0	0	0	0	6.05894	-
10.1002/smll.200500327	MWCNT			teabf4	3.5	229	0.44	0	0.18	0	0.86	0	0	0	0	0	0	0	4.25035	-
10.1002/smll.200500327	MWCNT			teabf4	3.5	247	0.37	0	0.18	0	0.83	0	0	0	0	0	0	40	19.5093	1.0503
10.1007/s11431-006-2008-z	carbon nanorods			koh	0.9	1347	1.01	3	0	0	0	0	0	0	0	0	0	189.1	178.798	0.0576193
10.1007/s11431-006-2008-z	carbon nanorods			koh	0.9	3310	0	2	0	0	0	0	0	0	0	0	0	333.9	351.169	0.0491757
10.1002/adma.200602184	carbon nanofiber			koh	0.9	310	0.17	0.54	0.15	0	0	3.5	4.9	0	0	0	0	120	56.2481	1.1334
10.1002/adma.200602184	carbon nanofiber			koh	0.9	420	0.22	0.54	0.2	0	0	2.9	4.8	0	0	0	0	128	103.964	0.231199
10.1002/adma.200602184	carbon nanofiber			koh	0.9	550	0.34	0.59	0.26	0	0	0.9	4.5	0	0	0	0	140	111.069	0.260474
10.1021/ja7106146				h2so4	1	2872	2.06	0	0	0	0	0	0	0	0	0	0	312	312.108	0.000347291
10.1002/anie.200702721				koh	1	970	0.69	2.85	0.3	0	0	0	0	0	0	0	0	68.4	165.174	0.58589
10.1039/b819202b				h2so4	0.9	1140	0	0	0	0	0	0	0	0	0	0	0	304	327.902	0.0728926
10.1039/c0jm00382d	porous carbon			koh	1	2273	2.74	4.47	0	0	0	0	0	0	0	0	0	168	205.242	0.181455
10.1021/ja910307x	porous carbon			h2so4	1.2	0	0	0	0	0	3.75	0	0	0	0	0	0	300	253.802	0.182022
10.1021/ja910307x				h2so4	1.2	0	0	0	0	0	3.6	0	0	0	0	0	0	200	245.21	0.184374
10.1021/ja910307x				h2so4	1.2	0	0	0	0	0	3.4	0	0	0	0	0	0	220	229.028	0.0394177
10.1021/ja910307x				h2so4	1.2	0	0	0	0	0	3.25	0	0	0	0	0	0	225	203.447	0.105938
10.1021/nn901825y	CDC			teabf4	2	2250	1.4	0	0	0	2.45	0	0	0	0	0	0	150	178.189	0.158196
10.1021/nn901825y	CDC			teabf4	2	2430	1.4	0	0	0	2.26	0	0	0	0	0	0	125	120.328	0.0388235
10.1021/nn901825y	CDC			teabf4	2	2420	1.5	0	0	0	2	0	0	0	0	0	0	138	94.6603	0.457845
10.1007/s11431-010-0017-4	CNT			liclo4	2.6	146.12	0	0	0	0	0	0	0	0	0	0	0	21.8	39.1004	0.442462
10.1007/s11431-010-0017-4				liclo4	2.6	159.74	0	0	0	0	0	0	0	0	0	0	0	60.4	59.6714	0.0122109
10.1002/aenm.201100114	porous carbon			net4bf4	2.7	1522	2.02	0	0	0	0	0	0	0	0	0	0	115	104.304	0.102542
10.1002/aenm.201100114	AC			net4bf4	2.7	2549	0	0	0	0	0	0	0	0	0	0	0	106	108.141	0.019795
10.1002/aenm.201100114	CNT			net4bf4	2.7	156	0	0	0	0	0	0	0	0	0	0	0	35	15.632	1.239
10.1039/c1ee01676h	carbon sphere	graphene		koh	1	0	0	0	0	0	0	0	0	0	0	0	0	198	125.854	0.573251
10.1039/c1ee01676h	graphene			koh	1	0	0	0	0	0	0	0	0	0	0	0	0	115	125.854	0.0862431
10.1039/c1ee01676h	carbon sphere			koh	1	0	0	0	0	0	0	0	0	0	0	0	0	38	125.854	0.698063
10.1002/chem.201101679	carbon			h2so4	0.9	415	0	0	0	0	0.19	0	0	0	0	0	0	120	131.029	0.0841744
10.1021/jp207135g	porous carbon			h2so4	0.9	710	0	0.71	0	0	0	0	5	0	0	0	0	185	113.487	0.630143
10.1021/jp207135g	porous carbon			h2so4	0.9	698	0	0.82	0	0	0	0	12	0	0	0	0	360	356.418	0.0100493
10.1021/jp207135g	porous carbon			h2so4	0.9	565	0	0.76	0	0	0	0	12	0	0	0	0	341	374.364	0.089121
10.1021/jp207135g	AC			h2so4	0.9	886	0	0	0	0	0	0	0	0	0	0	0	214	174.954	0.223178
10.1039/c1ee01094h	graphene			koh	0.9	801	0.9	3.7	0	0	0	0	10.1	0	0	0	0	218	204.791	0.064499
10.1039/c1ee01094h	porous carbon	graphene		koh	0.9	1496	3.36	1.4	0	0	0	0	3.2	0	0	0	0	171	160.896	0.0627973
10.1039/c1ee01094h	porous carbon	graphene		koh	0.9	1390	3.28	1.4	0	0	0	1.2	1.6	0	0	0	0	136	172.951	0.21365
10.1039/c1ee01094h	graphene			koh	0.9	787	0	0	0	0	0	0	3.5	0	0	0	0	95	75.785	0.253547
10.1021/cm103388y	porous carbon			nacl	0.9	429	0	0	0	0	0	0	0	0	0	0	0	30	81.0604	0.629906
10.1021/cm103388y	porous carbon			nacl	0.9	0	0	0	0	0	0	0	0	0	0	0	0	25	5.85495	3.26989
10.1021/cm103388y	porous carbon			h2so4	0.9	429	0	0	0	0	0	0	0	0	0	0	0	50	81.0604	0.383176
10.1021/cm103388y	porous carbon			h2so4	0.9	0	0	0	0	0	0	0	0	0	0	0	0	39	5.85495	5.66103
10.1021/jp2047618	porous carbon			nacl	1.4	846.5	0.76	7.57	0	0	0	0	0	0	0	0	0	18.31	-5.12176	-4.57494
10.1021/jp2047618	porous carbon			nacl	1.4	602.6	0.35	3.42	0	0	0	0	0	0	0	0	0	5.31	-8.9187	-1.59538
10.1021/jp2047618	porous carbon			nacl	1.4	492.9	0.092	3.25	0	0	0	0	0	0	0	0	0	8.51	-31.2072	-1.27269
10.1039/c0jm03199b	graphene	CNT		h2so4	1	538.9	0	0	0	0	0	0	0	0	0	0	0	326.5	59.3561	4.5007
10.1039/c0jm03199b	graphene			h2so4	1	138.2	0	0	0	0	0	0	0	0	0	0	0	83	131.06	0.366704
10.1126/science.1200770	graphene			bmimbf4	3.5	3100	2.14	0	0	0	1.19	0	0	0	0	0	0	165	182.458	0.09568
10.1126/science.1200770	graphene			teabf4	2.7	3100	2.14	0	0	0	1.19	0	0	0	0	0	0	150	165.445	0.0933528
10.1126/science.1200770	graphene			emitfsi	3.5	3100	2.14	0	0	0	1.19	0	0	0	0	0	0	200	182.458	0.0961455
10.1126/science.1200770	graphene			bmimbf4	3.5	2675	0	0	0	0	0	0	0	0	0	0	0	156	160.823	0.0299902
10.1002/aenm.201100654	porous carbon			koh	1	883	0	7	0	0	0	0	3.8	0	0	0	0	289	288.834	0.000576444
10.1007/s10008-011-1487-4	carbon xerogel	CNT		koh	0.9	2158	0.68	1.9	0	711	0	0	0	0	0	0	0	176	163.903	0.0738066
10.1007/s10008-012-1779-3	AC			koh	0.8	1759	0.93	2.7	0.61	0	0	0	0	0	0	0	0	218	141.39	0.541836
10.1007/s10008-012-1779-3	AC			koh	0.8	1452	0.81	4.63	0.56	0	0	0	0	0	0	0	0	127	140.904	0.0986769
10.1007/s10008-012-1779-3	AC			lipf6	2.4	2218	1.15	2.25	0.87	0	0	0	0	0	0	0	0	124	168.921	0.26593
10.1007/s10008-012-1779-3	AC			lipf6	2.4	1759	0.93	2.7	0.61	0	0	0	0	0	0	0	0	108	127.246	0.151247
10.1007/s10008-012-1779-3	AC			lipf6	2.4	1622	0.86	2.7	0.49	0	0	0	0	0	0	0	0	105	112.321	0.0651789
10.1007/s10008-012-1779-3	AC			lipf6	2.4	1452	0.81	4.63	0.56	0	0	0	0	0	0	0	0	147	100.818	0.458075
10.1007/s10008-012-1779-3	AC			et3menbf4	2.4	2218	1.15	2.25	0.87	0	0	0	0	0	0	0	0	112	168.921	0.336969
10.1007/s10008-012-1779-3	AC			et3menbf4	2.4	1759	0.93	2.7	0.61	0	0	0	0	0	0	0	0	108	127.246	0.151247
10.1007/s10008-012-1779-3	AC			et3menbf4	2.4	1622	0.86	2.7	0.49	0	0	0	0	0	0	0	0	100	112.321	0.109694
10.1007/s10008-012-1779-3	AC			et3menbf4	2.4	1452	0.81	4.63	0.56	0	0	0	0	0	0	0	0	120	100.818	0.190265
10.1021/nl3027372	porous carbon			lipf6	2.5	810	0	0	0	0	1.22	0	0	0	0	0	0	30	45.0938	0.33472
10.1021/nl3027372	porous carbon	CNT		lipf6	2.5	1340	0	0	0	0	1.08	0	0	0	0	0	0	45	16.5399	1.72069
10.1039/c2jm15645h	AC	CNT		h2so4	1	3160	1.58	0.8	0	0	0	0	0	0	0	0	0	295	269.475	0.0947209
10.1039/c2jm15645h	AC			h2so4	1	3110	1.68	0.7	0	0	0	0	0	0	0	0	0	280	297.344	0.0583302
10.1039/c2jm15645h	AC			h2so4	1	2930	1.7	0.75	0	0	0	0	0	0	0	0	0	305	303.218	0.00587582
10.1002/cssc.201100511	AC			Et4NBF4	2.5	830	0.32	0.8	0	820	0	0	0	0	0	0	0	170	165.865	0.0249319
10.1002/adfm.201102573	porous carbon			teabf4	4	2025	1.12	0	0	0	0	0	0	0	0	0	0	120	110.108	0.089838
10.1002/adfm.201102573	porous carbon			teabf4	4	1924	1.09	0	0	0	0	0	0	0	0	0	0	105	108.69	0.0339525
10.1002/adfm.201102573	porous carbon			teabf4	4	1405	0.74	0	0	0	0	0	0	0	0	0	0	146	138.071	0.0574272
10.1002/anie.201104334	CNT	carbon		koh	0.6	1080	0	0.7	0	0	1.25	0	0	0	0	0	0	125	119.759	0.043767
10.1002/anie.201104334	CNT			koh	0.6	1429	0	1.6	0	0	1.075	0	0	0	0	0	0	200	201.97	0.00975422
10.1021/jp3031557	porous carbon			hclo4	0.7	0	0	6	0	0	0	6.71	12.06	0	0	0	0	200	202.251	0.0111284
10.1039/c2ra20845h	porous carbon	graphene		koh	1	545.8	0.56	4	0	0	0	0	4.2	0	0	0	0	242	338.309	0.284678
10.1039/c2ra20845h	porous carbon	graphene		koh	1	582.3	0.59	3.9	0	0	0	0	0	0	0	0	0	190	159.732	0.189492
10.1039/c2ra20845h	porous carbon	graphene		koh	1	485.8	0.5	3.9	0	0	0	0	0	0	0	0	0	170	163.901	0.0372118
10.1039/c2ra20845h	porous carbon	graphene		koh	1	411.7	0.45	3.9	0	0	0	0	0	0	0	0	0	159	88.5094	0.796419
10.1039/c2ra20845h	porous carbon	graphene		koh	1	698.6	0.61	3.9	0	0	0	0	0	0	0	0	0	153	119.898	0.276083
10.1039/c2ra20845h	porous carbon	graphene		koh	1	507.5	0.53	3.9	0	0	0	0	0	0	0	0	0	173	169.194	0.0224948
10.1039/c2ra20845h	graphene			koh	1	321.2	0.23	0	0	0	0	0	0	0	0	0	0	95	116.446	0.184171
10.1039/c2ra20845h	porous carbon			koh	1	744.5	0.65	3.5	0	0	0	0	0	0	0	0	0	136	108.363	0.255045
10.1002/adma.201201948	NB-doped graphene			h2so4	0.8	249	0	3.2	0	0	1.19	3	0	0.6	0	0	0	239	233.201	0.0248671
10.1002/adma.201201948	B-doped graphene			h2so4	0.8	0	0	0	0	0	1.12	0	0	0.6	0	0	0	228	230.331	0.0101215
10.1002/adma.201201948	N-doped graphene			h2so4	0.8	0	0	0	0	0	1.14	3	0	0	0	0	0	190	181.993	0.043995
10.1002/adma.201201948	graphene			h2so4	0.8	0	0	0	0	0	1.05	0	0	0	0	0	0	181	89.4148	1.02427
10.1002/adma.201103872	porous carbon			h2so4	0.9	2053	0	6	0	0	0	0	0	0	0	0	0	216	186.365	0.159015
10.1002/adma.201103872	porous carbon			h2so4	0.9	1854	0	7	0	0	0	0	0	0	0	0	0	251	250.149	0.00340005
10.1002/adma.201103872	porous carbon			h2so4	0.9	1633	0	10	0	0	0	0	0	0	0	0	0	245	262.662	0.0672424
10.1002/adma.201103872	porous carbon			h2so4	0.9	312	0	0	0	0	0	0	0	0	0	0	0	42	83.7639	0.498591
10.1039/c3cc44175j	porous carbon			koh	0.8	854	1	1.2	0.12	269	1	6.7	4.1	0	0.7	5.6	0	131	131.122	0.000932203
10.1039/c3cc44175j	porous carbon			koh	0.8	1277	1.28	1.2	0.34	757	0	7.3	7.2	0	0.7	0	0	154	145.089	0.0614199
10.1039/c3cc44175j	porous carbon			koh	0.8	870	0.52	1.2	0.33	716	0	6.8	4.3	0	1	1.4	0	0	-0.028643	-
10.1039/c3cc44175j	porous carbon			koh	0.8	643	0.33	1.1	0.28	601	0	6.6	3.8	0	0.8	2	0	104	104.032	0.000311648
10.1039/c3cc44175j	porous carbon			koh	0.8	588	0.34	0.75	0.24	520	0	5.7	5.4	0	0.8	2.3	0	112	112.094	0.000837943
10.1039/c3cc44175j	porous carbon			koh	0.8	706	0.33	1.2	0.32	686	0	6.5	10.5	0	2.4	1.1	0	0	0.0372566	-
10.1039/c3cc44175j	porous carbon			koh	0.8	386	0.61	0	0.04	99	0	7.1	2.8	0	0.4	0.8	0	0	0.00111982	-
10.1039/c3cc44175j	porous carbon			koh	0.8	196	0.6	0	0.01	34	0	2.6	1.6	0	0.3	0.7	0	0	0.0274306	-
10.1002/adma.201301243	graphene			bmimbf4	3.5	256	1.15	0	0	0	0	0	0	0	0	0	0	137	135.665	0.00984298
10.1002/adma.201301243	graphene			emimtfsi	3.5	256	1.15	0	0	0	0	0	0	0	0	0	0	154	135.665	0.135152
10.1039/c3ta10501f	porous carbon		4.2-16.8-6c	koh	1	1330	1.35	4.05	0.46	981	0	0	0	0	0	0	0	193	188.495	0.0238991
10.1039/c3ta10501f	porous carbon		7-14-6c	koh	1	1234	0.93	3.01	0.45	1052	0	0	0	0	0	0	0	185	191.944	0.0361786
10.1039/c3ta10501f	porous carbon		9-12-6c	koh	1	1157	0.69	2.39	0.43	1050	0	0	0	0	0	0	0	182	281.881	0.354338
10.1039/c3ta10501f	porous carbon		14-7-6c	koh	1	761	0.34	1.78	0.29	736	0	0	0	0	0	0	0	0	4.42666	-
10.1039/c3ta10501f	porous carbon		7-14-0c	koh	1	348	0.58	6.61	0.1	215	0	0	0	0	0	0	0	114	107.641	0.0590775
10.1039/c3ta10501f	porous carbon		4.2-16.8-6m	koh	1	787	1.14	5.81	0.24	533	0	0	0	0	0	0	0	177	187.996	0.0584889
10.1039/c3ta10501f	porous carbon		7-14-6m	koh	1	576	0.49	3.41	0.2	467	0	0	0	0	0	0	0	0	63.819	-
10.1039/c3ta10501f	porous carbon			et4NBF4	2.7	1330	1.35	4.05	0.46	981	0	0	0	0	0	0	0	112	108.393	0.0332756
10.1039/c3ta10501f	porous carbon			et4NBF4	2.7	1234	0.93	3.01	0.45	1052	0	0	0	0	0	0	0	90	87.3797	0.029987
10.1039/c3ta10501f	porous carbon			et4NBF4	2.7	1157	0.69	2.39	0.43	1050	0	0	0	0	0	0	0	45	74.7973	0.398374
10.1039/c3ta10501f	porous carbon			et4NBF4	2.7	761	0.34	1.78	0.29	736	0	0	0	0	0	0	0	0	4.4245	-
10.1039/c3ta10501f	porous carbon			et4NBF4	2.7	348	0.58	6.61	0.1	215	0	0	0	0	0	0	0	15	15.5579	0.0358627
10.1039/c3ta10501f	porous carbon			et4NBF4	2.7	787	1.14	5.81	0.24	533	0	0	0	0	0	0	0	67	72.6553	0.0778373
10.1039/c3ta10501f	porous carbon			et4NBF4	2.7	576	0.49	3.41	0.2	467	0	0	0	0	0	0	0	0	9.08862	-
10.1002/adma.201302788	graphene	CNT		teabf4	3	0	0	0	0	0	0	4.85	7.52	0	0	0	0	110	104.014	0.0575466
10.1021/nn402077v	graphene		s	emimtfsi	3.5	650	0	0	0	0	0	0	17.38	0	2.95	0	0	0	0.0860756	-
10.1021/nn402077v	graphene		as	emimtfsi	3.5	3290	0	1	0	0	0	0	2.84	0	0	0	0	173	173.091	0.000527544
10.1021/nn4040734	graphene		go	10.1039/c3ta11051f	2	0	0	0	0	0	0	0	33.4	0	0	0	0	0	-1.59621	-
10.1021/nn4040734	graphene		mr-go	lipf6	2	0	0	0	0	0	0	35	8.8	0	0	0	0	0	4.02531	-
10.1021/nn4040734	graphene		rgo	lipf6	2	466	0.6	7	0	0	0	2.31	15.69	0	0	0	0	110	130.61	0.157797
10.1021/nn4040734	graphene		cmr-go	lipf6	2	1040	2.6	10	0	0	0	5.24	8	0	0	0	0	210	220.914	0.0494022
10.1021/nn4040734	graphene	CNT		lipf6	2	233	0.9	0	0	0	0	0	0	0	0	0	0	33	36.2394	0.0893886
10.1021/nn4040734	CNT			lipf6	2	176	0.7	0	0	0	0	0	0	0	0	0	0	15	32.6048	0.539945
10.1039/c2cc37396c	graphene		go	h3po4	1	0	0	0	0	0	0.76	0	0	0	0	0	0	0	77.2376	-
10.1039/c2cc37396c	graphene		rgo	h3po4	1	0	0	0	0	0	1.05	0	0	0	0	0	0	0	107.466	-
10.1039/c3ta11051f	porous carbon		pnsc	et4NBF4	2.7	2653	1.73	1.2	0	579	0	0	0	0	0	0	0	210	172.955	0.214187
10.1039/c3ta11051f	porous carbon		ac	et4NBF4	2.7	2269	1.15	0.7	0	752	0	0	0	0	0	0	0	114	115.736	0.0150001
10.1039/c3ta12037f	graphene	CNT		h2so4	1	33.1	0	0	0	0	0	0	0	0	0	0	0	252.4	139.828	0.805073
10.1039/c3ta12037f	CNT			h2so4	1	17.6	0	0	0	0	0	0	0	0	0	0	0	39.7	134.537	0.704914
10.1021/am402162b	porous carbon			h2so4	0.8	673.43	0.36	2.13	0.22	436.3	0	0	0	0	0	0	0	325.5	370.802	0.122172
10.1021/am402162b	porous carbon			h2so4	0.8	1040.31	0.61	2.35	0.29	586.8	0	0	0	0	0	0	0	425.8	390.969	0.0890898
10.1021/am402162b	porous carbon			h2so4	0.8	593.82	0.37	2.49	0.2	414.47	0	0	0	0	0	0	0	394	292.146	0.348641
10.1039/c3ta10998d	AC			h2so4	0.8	381.64	0	0	0	0	0	0	0	0	0	0	0	528	415.828	0.269756
10.1039/c3ta10998d	AC			h2so4	0.8	683.26	0	0	0	0	0	0	0	0	0	0	0	587	500.984	0.171694
10.1039/c3ta10998d	AC			h2so4	0.8	559.11	0	0	0	0	0	0	8.43	0	0	0	0	420	421.902	0.00450862
10.1021/sc400092g	AC			h2so4	1	1386	0.904	0.7	0.441	0	0	0	7.1	0	1	0	0	155	133.075	0.164759
10.1021/sc400092g	AC			h2so4	1	1615	1.237	0.5	0.545	0	0	0	11.3	0	0.3	0	0	175	170.082	0.0289176
10.1021/sc400092g	AC			h2so4	1	1766	1.527	0.7	0.537	0	0	0	13.5	0	0	0	0	210	244.059	0.139552
10.1021/sc400092g	AC	graphene		h2so4	1	775	0.54	0.5	0.271	0	0	0	8.5	0	1.7	0	0	155	158.982	0.0250465
10.1021/sc400092g	AC	graphene		h2so4	1	1231	1.437	0.7	0.269	0	0	0	9.2	0	1.7	0	0	185	183.94	0.00576373
10.1021/sc400092g	AC	graphene		h2so4	1	1315	0.886	0.5	0.435	0	0	0	11.4	0	0	0	0	240	209.215	0.147145
10.1021/sc400092g	AC	graphene		h2so4	1	783	0.608	0.7	0.244	0	0	0	10.7	0	0.9	0	0	150	159.541	0.0598055
10.1021/sc400092g	AC	graphene		h2so4	1	1083	0.87	0.7	0.317	0	0	0	11.7	0	0.8	0	0	190	180.757	0.0511362
10.1021/sc400092g	AC	graphene		h2so4	1	1162	0.868	0.7	0.369	0	0	0	11.3	0	0	0	0	210	203.074	0.0341049
10.1021/am4028235	graphene			h2so4	0.8	0	0	0	0	0	1.25	0	0	0	0	0	0	0	98.2386	-
10.1021/am4028235	graphene		gns	h2so4	0.8	682	0.72	4	0	0	1.62	0	10.75	0	0	0	0	100	104.666	0.044584
10.1021/am4028235	graphene		agns	h2so4	0.8	1383	1.2	1	0	0	1.3	0	9	0	0	0	0	160	161.563	0.00967311
10.5796/electrochemistry.81.804	porous carbon			teabf4	2	754	0.4	0	0.147	0	0	0	0.9	0	0	0	0	38	61.3593	0.380697
10.5796/electrochemistry.81.804	porous carbon			teabf4	2	364	0.195	0	0.047	0	0	0	4.2	0	0	0	0	20	72.7806	0.725202
10.1007/s10008-013-2025-3	porous carbon			h2so4	1	1180	1.56	7	0	0	0.9	0	0	0	0	0	0	241	223.365	0.0789498
10.1021/nn3015882	graphene	CNT		koh	0.8	0	0	0	0	0	0.33	0	0	0	0	0	0	104	224.673	0.537104
10.1149/2.016306jes	porous carbon			koh	0.7	592	0.94	0	0	0	0	0	0	0	0	0	0	71	50.9984	0.3922
10.1149/2.016306jes	porous carbon			koh	0.7	996	1.1	3.9	0	0	0	0	0	0	0	0	0	116	147.856	0.215454
10.1149/2.016306jes	porous carbon			koh	0.7	1097	1.25	3.9	0	0	0	0	0	0	0	0	0	124	161.983	0.234488
10.1149/2.016306jes	porous carbon			koh	0.7	1269	1.25	3.9	0	0	0	0	0	0	0	0	0	147	169.167	0.131034
10.1039/c3ta12722b	porous carbon			na2so4	1	1130	2.188	3	0	0	1.18	0	0	0	0	0	0	132	158.913	0.169355
10.1002/adfm.201201643	N-doped carbon			koh	1.2	95.6	0.224	0	0	0	0	3.73	11.4	0	0	0	0	0	39.9478	-
10.1002/adfm.201201643	N-doped carbon			koh	1.2	985	0.986	0	0	515	0	4.66	7.2	0	0	0	0	0	0.495015	-
10.1002/adfm.201201643	N-doped carbon			koh	1.2	1578	1.092	0	0	1133	0	0.68	16.4	0	0	0	0	310	314.249	0.0135201
10.1002/adfm.201201643	N-doped carbon			h2so4	1	1578	1.092	0	0	1133	0	0.68	16.4	0	0	0	0	305	292.968	0.0410701
10.1039/c3ta15245f	porous carbon		cns	h2so4	1	345.8	0.476	0	0	0	0	0	0	0	0	0	0	210	157.198	0.335894
10.1039/c3ta15245f	porous carbon		cnt	h2so4	1	379.9	0.513	0	0	0	1.15	1.53	3.1	0	0	0	0	227	200.73	0.130875
10.1039/c3ta15245f	porous carbon		acnp	h2so4	1	1332.4	0.77	0	0	955	0	0	0	0	0	0	0	85	65.9867	0.288138
10.1039/c3ta15245f	porous carbon		acns	h2so4	1	1957	1.5	0	0	687.3	0	0	0	0	0	0	0	315	328.355	0.0406718
10.1039/c3ta15245f	porous carbon		acnt	h2so4	1	2005.9	1.6	0.55	0	1104.3	1.12	0.1	6.27	0	0	0	0	319	332.742	0.0412998
10.1039/c3ta15245f	porous carbon		acnp	emimbf4	3.5	1332.4	0.77	0	0	955	0	0	0	0	0	0	0	83.5	84.8665	0.0161013
10.1039/c3ta15245f	porous carbon		acns	emimbf4	3.5	1957	1.5	0	0	687.3	0	0	0	0	0	0	0	110	110.938	0.0084555
10.1039/c3ta15245f	porous carbon		acnt	emimbf4	3.5	2005.9	1.6	0.55	0	1104.3	1.12	0.1	6.27	0	0	0	0	140	141.208	0.00855752
10.1039/c4ta03490b	porous carbon			koh	1	1427.7	5.91	0.568	0.223	510.4	0	3.73	4.07	0	0	0	0	378.5	378.912	0.00108841
10.1039/c4ta03490b	porous carbon			koh	1	1036.6	4.76	0.563	0.12	268.8	0	1.8	4.37	0	0	0	0	263.4	244.863	0.0757021
10.1021/jp501742x	N-doped porous carbon			koh	1	3034.8	0	1.17	0	0	3.255	5.08	11.91	0	0	0	0	189	189.902	0.0047488
10.1021/jp501742x	N-doped porous carbon			koh	1	3384.3	0	1.17	0	0	4.182	5.67	11.64	0	0	0	0	219	220.48	0.00671199
10.1021/jp501742x	N-doped porous carbon			koh	1	3124.4	0	1.17	0	0	2.739	2.34	3.93	0	0	0	0	270	271.437	0.00529239
10.1021/jp501742x	N-doped porous carbon			koh	1	3336.7	0	1.17	0	0	3.412	0.63	3.53	0	0	0	0	247	239.811	0.0299791
10.1039/c4ta00936c	graphene			koh	1	343	1.6	0.62	0.14	0	1.38	0	1.54	0	0	0	0	7.86	25.9648	0.697283
10.1039/c4ta00936c	B-doped graphene			koh	1	301	1.5	0.62	0.12	0	1.25	0	3.67	2.56	0	0	0	19.9	26.0922	0.23732
10.1039/c4ta00936c	N-doped graphene			koh	1	342	1.59	0.62	0.14	0	1.22	0.54	1.8	0	0	0	0	22.2	-5.90736	-4.75802
10.1039/c4ta00936c	NB-doped graphene			koh	1	341	1.34	0.62	0.14	0	1.03	1.02	2.85	2.39	0	0	0	29.7	30.8932	0.0386232
10.1039/c4ta00936c	graphene			koh	1	195	0.66	0.62	0.08	0	0.99	0	2.94	0	0	0	0	0	-22.0862	-
10.1039/c4ta00936c	B-doped graphene			koh	1	121	0.39	0.62	0.05	0	0.89	0	2.71	1.74	0	0	0	0	0.279555	-
10.1039/c4ta00936c	N-doped graphene			koh	1	222	0.81	0.62	0.09	0	1.11	0.36	2.08	0	0	0	0	0	34.2065	-
10.1039/c4ta00936c	NB-doped graphene			koh	1	168	0.6	0.62	0.06	0	1.07	0.79	1	1.98	0	0	0	0	0.30767	-
10.1039/c4ta00936c	graphene			h2so4	1	343	1.6	0.62	0.14	0	1.38	0	1.54	0	0	0	0	2.59	25.9648	0.90025
10.1039/c4ta00936c	B-doped graphene			h2so4	1	301	1.5	0.62	0.12	0	1.25	0	3.67	2.56	0	0	0	34.6	26.0922	0.326067
10.1039/c4ta00936c	N-doped graphene			h2so4	1	342	1.59	0.62	0.14	0	1.22	0.54	1.8	0	0	0	0	10.6	-5.90736	-2.79437
10.1039/c4ta00936c	NB-doped graphene			h2so4	1	341	1.34	0.62	0.14	0	1.03	1.02	2.85	2.39	0	0	0	29.6	30.8932	0.0418601
10.1002/smll.201401550	nanofiber			koh	1	0	0	0	0	0	0.93	0	0	0	0	0	0	180	92.7896	0.939872
10.1002/smll.201401550	nanofiber			koh	1	0	0	0	0	0	0.92	0	0	0	0	0	0	225	91.7637	1.45195
10.1002/smll.201401550	nanofiber			koh	1	659	0	0.58	0	0	0.93	3.01	9.01	0	0	0	0	325	348.466	0.0673403
10.1002/smll.201401550	nanofiber			koh	1	0	0	0	0	0	0.95	0	0	0	0	0	0	175	94.9111	0.843832
10.1039/c3ra46037a	AC			koh	0.9	552	0.38	3	0.13	0	2.64	0	0	0	0	0	0	140	120.528	0.161557
10.1039/c3ra46037a	AC			koh	0.9	1616	0.86	2.1	0.38	0	4.54	0	0	0	0	0	0	173	180.533	0.0417278
10.1039/c3ra46037a	AC			koh	0.9	2490	1.7	2.5	0.43	0	0.55	0	0	0	0	0	0	283	290.698	0.0264805
10.1039/c4ta00538d	porous carbon			koh	1	803	5.5	0	0	0	0	0	5.68	0	0	0	0	150	155.286	0.0340415
10.1039/c4ta00538d	graphene			koh	1	406	0.2	4.3	0	0	0	0	30.74	0	0	0	0	275	279.833	0.0172723
10.1039/c4ta00538d	porous carbon	graphene		koh	1	460	0.36	7.3	0	0	0	0	11.82	0	0	0	0	324	283.2	0.144066
10.1039/c4ta02167c	3D porous carbon			koh	1	477	0.23	1.96	0	412	1.01	0	0	0	0	0	0	80	2.13222	36.5196
10.1039/c4ta02167c	3D porous carbon			koh	1	1292	0.56	1.73	0	1193	0	0	0	0	0	0	0	0	-0.404329	-
10.1039/c4ta02167c	3D porous carbon			koh	1	1734	0.82	1.87	0	1511	0	0	0	0	0	0	0	220	195.032	0.12802
10.1039/c4ta02167c	3D porous carbon			koh	1	2322	1.24	2.14	0	1933	0	0	0	0	0	0	0	0	-8.96456	-
10.1039/c4ta02167c	3D porous carbon			koh	1	2753	1.54	2.23	0	2131	1.12	0	0	0	0	0	0	307	312.966	0.0190622
10.1039/c4ta02167c	3D porous carbon			koh	1	613	0.29	1.93	0	503	0	0	0	0	0	0	0	0	21.1575	-
10.1039/c4ta02167c	3D porous carbon			koh	1	2086	1.1	2.1	0	1635	0	0	0	0	0	0	0	250	246.345	0.0148352
10.1002/chem.201402897	3D carbon	graphene	rgo	koh	1	178	2.86	0	0.04	76	1.69	0	0	0	0	0	0	126	127.494	0.0117196
10.1002/chem.201402897	3D carbon	graphene	rdc	koh	1	1288	0.82	2.6	0.36	673	1.69	0	0	0	0	0	0	241	216.247	0.114469
10.1002/chem.201402897	3D carbon	graphene	grdc	koh	1	2034	1.78	3.5	0.28	514	1.93	0	0	0	0	0	0	275	267.922	0.0264182
10.1002/chem.201402897	3D carbon			emimbf4	3	178	2.86	0	0.04	76	1.69	0	0	0	0	0	0	58	57.7712	0.00396117
10.1002/chem.201402897	3D carbon			emimbf4	3	1288	0.82	2.6	0.36	673	1.69	0	0	0	0	0	0	100	97.2087	0.0287141
10.1002/chem.201402897	3D carbon			emimbf4	3	2034	1.78	3.5	0.28	514	1.93	0	0	0	0	0	0	151.7	146.785	0.033481
10.1039/c4cp00550c	porous carbon		paf	koh	1.2	5340	2.43	1.4	1.44	0	0	0	0	0	0	0	0	0	-3.71703	-
10.1039/c4cp00550c	porous carbon		n2paf	koh	1.2	880	0.44	0.6	0.3	0	0	0.2	14.2	1.02	0	0	0	146	146.419	0.00286161
10.1039/c4cp00550c	porous carbon		co2paf	koh	1.2	1513	0.8	0.64	0.46	0	0	0.2	14.26	1.02	0	0	0	159	159.226	0.00141846
10.1039/c4cp00550c	porous carbon		napaf	koh	1.2	1916	1.36	0.93	0.39	0	0	0.2	12.9	1.02	0	0	0	190	193.606	0.0186259
10.1039/c4cp00550c	porous carbon		kpaf	koh	1.2	2926	1.45	0.79	1.14	0	0	0.2	7.67	1.02	0	0	0	280	274.805	0.0189051
10.1039/c4cp00550c	porous carbon		charcoal	koh	1.2	836	0.5	0.67	0.27	0	0	0	0	0	0	0	0	80	83.9412	0.046952
10.1039/c4cp00550c	porous carbon		kpaf	teabf4	2	2926	1.45	0.79	1.14	0	0	0.2	7.67	1.02	0	0	0	142	158.836	0.105996
10.1039/c4cp00550c	porous carbon		kpaf	emimbf4	2	2926	1.45	0.79	1.14	0	0	0.2	7.67	1.02	0	0	0	156	158.836	0.0178543
10.1039/c4cp00550c	porous carbon		kpaf	bmimbf4	2	2926	1.45	0.79	1.14	0	0	0.2	7.67	1.02	0	0	0	167	158.836	0.0513995
10.1039/c4cp00550c	porous carbon		kpaf	teabf4	2	2926	1.45	0.79	1.14	0	0	0.2	7.67	1.02	0	0	0	125	158.836	0.213024
10.1039/c4cp00550c	porous carbon		kpaf	emimtfsi	2	2926	1.45	0.79	1.14	0	0	0.2	7.67	1.02	0	0	0	203	158.836	0.278049
10.1039/c4cp00550c	porous carbon		600	koh	1.2	2325	1.1	0	0.88	0	0	0	0	0	0	0	0	203	183.655	0.105333
10.1039/c4cp00550c	porous carbon		800	koh	1.2	2857	1.44	0	1.11	0	0	0	0	0	0	0	0	240	262.583	0.0860035
10.1039/c3ee43979h	N-doped carbon		hfc	koh	1	17.8	0	0	0	2.2	1	8.4	9.5	0	0	0	0	0	1.39469	-
10.1039/c3ee43979h	N-doped carbon		hfav1	koh	1	521	0.38	0	0	459.1	1	7.3	10.7	0	0	0	0	273	236.734	0.153195
10.1039/c3ee43979h	N-doped carbon		2	koh	1	1217.1	0.46	0	0	1073.5	1	6.3	15.2	0	0	0	0	556	539.869	0.0298795
10.1039/c3ee43979h	N-doped carbon		3	koh	1	1405.6	0.73	0	0	1211.3	1	4.2	13.6	0	0	0	0	420	416.199	0.00913263
10.1039/c3ee43979h	AC		ac	koh	1	1840.3	1.17	0	0	1186.7	1	0	4.5	0	0	0	0	180	190.482	0.0550264
10.1039/c3ee43979h	N-doped carbon			h2so4	1	521	0.38	0	0	459.1	1	7.3	10.7	0	0	0	0	227	236.734	0.0411165
10.1039/c3ee43979h	N-doped carbon			h2so4	1	1217.1	0.46	0	0	1073.5	1	6.3	15.2	0	0	0	0	525	539.869	0.0275419
10.1039/c3ee43979h	N-doped carbon			h2so4	1	1405.6	0.73	0	0	1211.3	1	4.2	13.6	0	0	0	0	409	416.199	0.017297
10.1039/c3ee43979h	AC			h2so4	1	1840.3	1.17	0	0	1186.7	1	0	4.5	0	0	0	0	182	190.482	0.0445266
10.1039/c4ra08519a	GO		go	koh	1	45.2	0.7	0	0	0	0.64	0	21.74	0	0	0	0	0	-7.8389	-
10.1039/c4ra08519a	rgo		rgo	koh	1	305.1	2.5	0	0	0	0	0	4.81	0	0	0	0	89	96.2219	0.0750549
10.1039/c4ra08519a	porous graphene		crgo-10	koh	1	124.5	1.1	0	0	0	0.81	0	10.1	0	0	0	0	112	86.7871	0.290514
10.1039/c4ra08519a	porous graphene		30	koh	1	427.3	2.8	0	0	0	1.12	0	8.19	0	0	0	0	143	138.038	0.0359492
10.1039/c4ra08519a	porous graphene		60	koh	1	1218.5	5.3	0	0	0	1.73	0	3.95	0	0	0	0	291	290.821	0.0006138
10.1007/s10854-013-1621-4	porous carbon		600	koh	1	686.8	0.91	5.3	0.25	0	0	0	0	0	0	0	0	111	176.537	0.371237
10.1007/s10854-013-1621-4	porous carbon		700	koh	1	1076.9	1.46	5.4	0.41	0	0	0	0	0	0	0	0	175	166.115	0.0534843
10.1007/s10854-013-1621-4	porous carbon		800	koh	1	363	0.73	8.1	0.12	0	0	0	0	0	0	0	0	86	52.3203	0.64372
10.1007/s10854-013-1621-4	porous carbon		900	koh	1	521	0.74	5.7	0.19	0	0	0	0	0	0	0	0	91	133.819	0.319977
10.1021/am502604u	graphene	CNT		koh	0.9	263	0.28	4.7	0	0	1.03	0	0	0	0	0	0	162.3	141.697	0.145403
10.1002/elan.201300161	S-doped porous carbon			h2so4	1	700	0.473	0.211	0.161	0	0	0	10.7	0	2.9	0	0	138	138.206	0.00148822
10.1002/elan.201300161	S-doped porous carbon	graphene		h2so4	1	755	0.587	0.271	0.21	0	0	0	10	0	2.6	0	0	178	174.552	0.0197545
10.1002/elan.201300161	S-doped porous carbon	graphene		h2so4	1	831	0.589	0.283	0.217	0	0	0	11.2	0	3.1	0	0	144	144.573	0.00396031
10.1002/elan.201300161	S-doped porous carbon	graphene		h2so4	1	847	0.605	0.307	0.237	0	0	0	8.9	0	2.6	0	0	157	161.249	0.0263509
10.1021/sc500069h	CNT			h2so4	0.8	272	0.68	0	0.05	0	0	0	0	0	0	0	0	20	6.45652	2.09764
10.1021/sc500069h	N-doped carbon	CNT		h2so4	0.8	200	0.45	0	0.04	0	0	1.8	0	0	0	0	0	50	94.9484	0.473398
10.1021/sc500069h	N-doped carbon	CNT		h2so4	0.8	172	0.45	0	0.03	0	0	2.5	0	0	0	0	0	56	119.93	0.533059
10.1039/c4ra05881j	N-doped carbon		700	koh	1	1305	0.586	1	0.505	1255	0	2.42	32.64	0	0	0	0	199	196.528	0.0125782
10.1039/c4ra05881j	N-doped carbon		750	koh	1	1505	0.679	1	0.588	1443	0	2.35	21.31	0	0	0	0	214	230.861	0.0730363
10.1039/c4ra05881j	N-doped carbon		800	koh	1	1586	0.795	1	0.688	1499	0	2.09	10.22	0	0	0	0	232	239.563	0.0315702
10.1039/c4ra05881j	N-doped carbon		850	koh	1	1598	0.862	1	0.737	1508	0	1.89	7.91	0	0	0	0	221	206.304	0.0712358
10.1039/c4ra05881j	N-doped carbon		900	koh	1	1424	0.784	1	0.663	1334	0	1.68	7.23	0	0	0	0	176	177.368	0.00771074
10.1021/sc500118r	CNT			na2so4	1.8	325.48	0.24	5.32	0.09	0	0	0	4.43	0	0	0	0	29	32.0493	0.0951437
10.1021/sc500118r	N-doped AC	CNT		na2so4	1.8	489.39	0.37	6.23	0.11	0	0	0	0	0	0	0	0	78	48.7261	0.600783
10.1021/sc500118r	N-doped AC	CNT		na2so4	1.8	1889.12	1.72	3.78	0.61	0	0	6.71	7.89	0	2.28	0	0	105.4	106.816	0.0132544
10.1007/s11814-013-0228-z	porous carbon		sc	h2so4	0.6	169.6	0.246	2.9	0.052	129.84	0	0	0	0	0	0	0	0	-24.8565	-
10.1007/s11814-013-0228-z	porous carbon		rs	h2so4	0.6	135.06	0.196	2.7	0.042	96.04	0	0	0	0	0	0	0	0	29.8488	-
10.1007/s11814-013-0228-z	porous carbon		sc6	h2so4	0.6	676.95	0.424	1.2	0.254	620.21	0	0	0	0	0	0	0	340	297.95	0.14113
10.1007/s11814-013-0228-z	porous carbon			h2so4	0.6	376.65	0.324	1	0.196	330.19	0	0	0	0	0	0	0	112	130.856	0.144097
10.1007/s11814-013-0228-z	porous carbon		sc7	h2so4	0.6	666.87	0.387	1.4	0.232	592.46	0	0	0	0	0	0	0	0	82.4369	-
10.1007/s11814-013-0228-z	porous carbon		rs7	h2so4	0.6	366.57	0.287	1.2	0.175	312.46	0	0	0	0	0	0	0	0	35.8497	-
10.1007/s11814-013-0228-z	porous carbon		sc8	h2so4	0.6	549.78	0.338	1	0.192	459.41	0	0	0	0	0	0	0	92	86.0388	0.0692846
10.1007/s11814-013-0228-z	porous carbon			h2so4	0.6	349.98	0.238	0.9	0.152	279.41	0	0	0	0	0	0	0	56	17.8568	2.13607
10.1039/c4nr00538d	porous graphene			koh	0.9	1754	2.81	3	0	0	0	0	0	0	0	0	0	303	232.409	0.303735
				teabf4	2.5	1754	2.81	3	0	0	0	0	0	0	0	0	0	140	150.066	0.0670759
10.1039/c3ta15046a	N-doped porous carbon			koh	0.9	2080	1.23	1.89	0	0	0	2.8	12.4	0	0	0	0	270	270.999	0.00368807
10.1039/c3ta14278g	CMK-3			nh4bf4	2.5	1233	1.59	4	0.08	176	0	0	0	0	0	0	0	0	16.9986	-
10.1007/s12540-014-5024-8	RGO	CNT		h2so4	1	0	0	0	0	0	0	0	0	0	0	0	0	187	125.854	0.485848
10.1039/c4ta02565b	porous carbon			koh	1.2	745	0.83	1	0.23	0	0	0	0	0	0	0	0	181	155.912	0.160914
10.1039/c4ta02565b	porous carbon			koh	1.2	1026	1.71	3.2	0.16	0	0	0	0	0	0	0	0	175	220.569	0.206599
10.1039/c4ta02565b	porous carbon			koh	1.2	721	1.68	17	0.15	0	0	0	0	0	0	0	0	164	156.254	0.0495719
10.1021/nn500150j	graphene	cnt		koh	1	123.78	0	0.82	0	0	0	0	2.71	0	0	0	0	145	120.599	0.202336
10.1021/nn500150j	graphene			koh	1	311.05	0	0	0	0	0	0	0	0	0	0	0	170	76.2387	1.22984
10.1021/nn500150j	graphene			koh	1	128.54	0	0	0	0	0	0	0	0	0	0	0	143	134.075	0.0665633
10.1149/2.0111410jes	carbon			teabf4	4	179.1	0.1	0	0	0	0	0.1	5.87	0	0	0	0	166	152.722	0.0869458
10.1149/2.0111410jes	carbon			teabf4	4	86.8	0.05	0	0	0	0	0.23	5.23	0	0	0	0	139.7	152.81	0.0857941
10.1149/2.0111410jes	carbon			teabf4	4	37.6	0.01	0	0	0	0	0.15	5.11	0	0	0	0	72.6	65.5849	0.106962
10.1021/sc400414r	porous carbon			na2so4	1	1800	1.2	0.63	0	0	0	0	0	0	0	0	0	133	160.538	0.171537
10.1021/sc400414r	porous carbon				0	0	0	0	0	0	0	0	0	0	0	0	0	0	-17.9496	-
10.1039/c4ta00475b	porous carbon		l750	koh	1	455	0.33	0.46	0.23	0	0.98	0	0	0	0	0	0	127.6	156.939	0.186944
10.1039/c4ta00475b	porous carbon		l850	koh	1	686	0.5	0.49	0.32	0	0.934	0	0	0	0	0	0	200.72	158.573	0.265786
10.1039/c4ta00475b	porous carbon		l950	koh	1	783	0.56	0.5	0.37	0	0.926	0	0	0	0	0	0	226.2	157.682	0.434535
10.1039/c4ta00475b	porous carbon		l1000	koh	1	799	0.54	0.51	0.39	0	0.877	0	0	0	0	0	0	135.4	153.402	0.117354
10.1039/c4ta00475b	porous carbon		g950	koh	1	640	0.47	0.48	0.33	0	0.952	0	0	0	0	0	0	182	167.649	0.0855995
10.1039/c4ta00475b	porous carbon		f950	koh	1	566	0.4	0.48	0.29	0	0.926	0	0	0	0	0	0	99.2	161.624	0.386231
10.1039/c4ta00475b	porous carbon		e950	koh	1	515	0.36	0.49	0.21	0	0.926	0	0	0	0	0	0	144.8	126.724	0.142641
10.1039/c4ta00475b	porous carbon		z950	koh	1	406	0.29	0.51	0.22	0	0.926	0	0	0	0	0	0	198	139.362	0.420757
10.1007/s10008-013-2236-7	porous carbon			koh	1	672	0.38	1.56	0.34	654	0	0	10.48	0	0	0	0	300.4	288.281	0.0420406
10.1007/s10008-013-2236-7	porous carbon			koh	1	1023	0.56	1.2	0.52	1006	0	0	8.96	0	0	0	0	272.3	236.513	0.151313
10.1007/s10008-013-2236-7	porous carbon			koh	1	1380	0.78	1.25	0.59	1169	0	0	8.17	0	0	0	0	243.4	239.057	0.0181658
10.1039/c3ra44981e	porous carbon			koh	1	2008	3.44	1.4	0.27	447	0	0	0	0	0	0	0	288.3	288.263	0.000127383
10.1039/c3ra44981e	porous carbon			emimbf4	3	2008	3.44	1.4	0.27	447	0	0	0	0	0	0	0	132.3	124.027	0.0667057
10.1039/c3ra45076g	porous carbon			h2so4	1	705.9	0	0	0	0	0	19.8	11.1	0	0	0	0	411.8	409.724	0.00506717
10.1039/c3ra45076g	porous carbon			h2so4	1	212.4	0	0	0	0	0	15.8	4	0	0	0	0	272	262.142	0.0376049
10.1039/c4ta01465k	porous carbon			koh	0.9	312	0.26	0	0.12	0	0.78	1.2	5.6	0	0	0	0	125	152.672	0.181252
10.1039/c4ta01465k	porous carbon			koh	0.9	1588	1.01	0	0.74	0	0.84	5.3	9.3	0	0	0	0	240.4	246.111	0.0232035
10.1039/c4ta01465k	porous carbon			koh	0.9	2665	1.46	0	1.18	0	0.81	1.1	10.9	0	0	0	0	279.1	258.654	0.0790459
10.1039/c4ta01465k	porous carbon			koh	0.9	2856	1.25	0	1.1	0	0.83	2.2	11.1	0	0	0	0	386.2	390.62	0.0113149
10.1039/c4ta01465k	porous carbon			koh	0.9	3253	1.72	0	1.08	0	0.86	0.9	7.1	0	0	0	0	365.9	358.5	0.0206408
10.1002/aenm.201401309	N-doped porous carbon			koh	1	881	0	1.78	0	0	0	0	0	0	0	0	0	0	-2.51272	-
10.1002/aenm.201401309	N-doped porous carbon			koh	1	512	0	3.92	0	0	0	0	0	0	0	0	0	0	30.2719	-
10.1002/aenm.201401309	N-doped porous carbon			koh	1	458	0	4.43	0	0	0	0	0	0	0	0	0	0	69.9	-
10.1002/aenm.201401309	N-doped porous carbon			koh	1	319	0	4.56	0	0	0	0	0	0	0	0	0	0	64.8761	-
10.1002/aenm.201401309	N-doped porous carbon			koh	1	313	0	4.6	0	0	0	0	0	0	0	0	0	0	53.4577	-
10.1039/c4ta06110a	nanosheet			h2so4	1	7.91	0.0018	0	0	5.24	0.68	0.6	1.9	0	0	0	0	2.1	14.1973	0.852084
10.1039/c4ta06110a	nanosheet			h2so4	1	543.68	0.25	0	0	539.98	0.89	1.2	8.5	0	0	0	0	221.3	232.393	0.0477318
10.1002/cssc.201402621	porous carbon			h2so4	1	1092	0	0	0	0	0.67	0	3.5	0	0	0	0	91	167.781	0.457625
10.1002/cssc.201402621	porous carbon			h2so4	1	519	0	0	0	0	1.24	0	6.8	0	0	0	0	35	47.0886	0.25672
10.1002/cssc.201402621	porous carbon			h2so4	1	126	0	0	0	0	2.37	1.2	14.5	0	0	0	0	3	12.3042	0.75618
10.1002/aenm.201500771	graphene			koh	1	8.6	0.032	0	0	0	0	0	37.5	0	0	0	0	270	274.149	0.015134
10.1002/aenm.201500771	graphene			koh	1	7.24	0.021	0	0	0	0	0	36.31	0	0	0	0	353	351.534	0.00416897
10.1002/aenm.201500771	graphene			koh	1	12.86	0.043	0	0	0	0	0	31.51	0	0	0	0	280	281.394	0.00495409
10.1002/aenm.201500771	graphene			koh	1	15.79	0.057	0	0	0	0	0	28.06	0	0	0	0	170	162.58	0.0456394
10.1002/aenm.201500771	graphene			koh	1	6.24	0.017	0	0	0	0	0	23.06	0	0	0	0	276	233.992	0.179528
10.1021/acsnano.5b04821	porous carbon			h2so4	1	101.8	0.09	1	0	54.7	0	0	0	0	0	0	0	0	79.5022	-
10.1021/acsnano.5b04821	porous carbon			h2so4	1	322.1	0.22	0.6	0	207.8	0	0	0	0	0	0	0	0	11.7251	-
10.1021/acsnano.5b04821	porous carbon			h2so4	1	408.6	0.27	0.6	0	267.1	0	0	0	0	0	0	0	0	15.3566	-
10.1021/acsnano.5b04821	porous carbon			h2so4	1	520.6	0.32	0.5	0	351.8	0	0	0	0	0	0	0	0	-1.31237	-
10.1021/acsnano.5b04821	porous carbon		ahpc600	h2so4	1	3270	1.94	1.5	0	149.3	0	0	3.8	0	0	0	0	425	420.034	0.011823
10.1021/acsnano.5b04821	porous carbon			h2so4	1	3032	1.6	1.3	0	151.4	0	0	0	0	0	0	0	0	0.0824067	-
10.1021/acsnano.5b04821	porous carbon			h2so4	1	2806	1.38	0.8	0	926.1	0	0	0	0	0	0	0	0	30.8315	-
10.1021/acsnano.5b04821	porous carbon			h2so4	1	2432.2	1.4	0.6	0	1048.4	0	0	0	0	0	0	0	0	1.99642	-
10.1021/acsnano.5b04821	porous carbon			h2so4	1	236.3	0.11	0.5	0	212.9	0	0	0	0	0	0	0	0	-36.9527	-
10.1021/acsnano.5b04821	porous carbon		ac	h2so4	1	2170	1.02	0.6	0	1173	0	0	0	0	0	0	0	0	-15.9713	-
10.1021/acsnano.5b04821	porous carbon			teabf4	2	3270	1.94	1.5	0	149.3	0	0	3.8	0	0	0	0	210	209.819	0.000864343
10.1021/acsnano.5b04821	porous carbon			teabf4	2	2170	1.02	0.6	0	1173	0	0	0	0	0	0	0	132	133.098	0.00824921
10.1039/c4ra13482f	porous carbon			h2so4	0.6	1230	0	2.13	0	0	0	0	0	0	0	0	0	181	171.243	0.0569766
10.1021/acsami.5b06698	porous graphene			koh	1	677.5	0	3.42	0	0	1.11	2.16	3.16	0	0	0	0	0	9.94042	-
10.1021/acsami.5b06698				koh	1	1015.4	0	3.87	0	0	1.07	5.04	8.76	0	0	0	0	440	423.568	0.0387943
10.1039/c4ra13720e	porous graphene			koh	1	715	0.99	1.53	0	0	1.47	0	0	0	0	0	0	177	191.881	0.0775539
10.1039/c4ra13720e	graphene			koh	1	220	0.45	0	0	0	1.43	0	0	0	0	0	0	99	181.179	0.453578
10.1039/c5ta01831e	graphene	CNT		koh	1	811.5	0	0	0	0	0.9	0	0	0.9	0	0	0	212.7	226.494	0.060902
10.1039/c5ta01831e	graphene			koh	1	891.2	0	0	0	0	1.02	0	0	1.02	0	0	0	116.6	114.469	0.0186157
10.1039/c4ra11028e	AC		ks1.25	koh	1.3	1642	0.72	1.17	0	0	0.74	0	0	0.74	0	0	0	234	222.165	0.0532732
10.1039/c4ra11028e	AC		ks2.5	koh	1.3	2823	1.47	1.17	0	0	0.76	0	0	0.76	0	0	0	316	321.451	0.0169589
10.1039/c4ra11028e	AC		ks5	koh	1.3	2094	1.19	1.17	0	0	1.11	0	0	1.11	0	0	0	224	218.885	0.0233705
10.1039/c4ra12635a	CNT			SF	1	1889.12	1.72	1.7	0	0	0	0	0	0	0	0	0	145	132.018	0.0983344
10.1039/c4ra12635a	CNT			CL	1	1889.12	1.72	1.7	0	0	0	0	0	0	0	0	0	103	132.018	0.219804
10.1039/c5ta03899e	3D carbon			koh	1	376.3	0.205	2.181	0.134	332	0	0	0	0	0	0	0	240	161.974	0.481717
10.1039/c5ta03899e	3D carbon			koh	1	1563	0.876	2.242	0.695	1452	0	0	0	0	0	0	0	245	191.375	0.280207
10.1039/c5ta03899e	3D carbon			koh	1	986.7	0.442	1.791	0.378	943.1	0	0	0	0	0	0	0	314	281.128	0.11693
10.1039/c5ta03899e	3D carbon			koh	1	1221	0.664	2.176	0.528	1124	0	0	0	0	0	0	0	290	244.729	0.184982
10.1021/acscentsci.5b00149	3D carbon			h2so4	1	19	0.08	0	0	0	1.055	7.92	51.46	0	0	0	0	0	-1.74659	-
10.1021/acscentsci.5b00149	3D carbon			h2so4	1	18	0.11	0	0	0	1.049	7.43	49.71	0	0	0	0	0	-0.643897	-
10.1021/acscentsci.5b00149	3D carbon			h2so4	1	62	0.11	0	0	0	0.983	8.28	45.72	0	0	0	0	0	2.29001	-
10.1021/acscentsci.5b00149	3D carbon			h2so4	1	48	0.17	0	0	0	0.918	9.11	41.89	0	0	0	0	0	3.18554	-
10.1021/acscentsci.5b00149	3D carbon			h2so4	1	148	0.22	0	0	0	0.894	5.65	36.35	0	0	0	0	0	1.41521	-
10.1021/acscentsci.5b00149	3D carbon			h2so4	1	423	0.38	0	0	0	0.914	4.09	33.91	0	0	0	0	0	-12.5435	-
10.1021/acscentsci.5b00149	3D carbon		hpg	h2so4	1	4073	2.26	0	0	0	1.121	0.55	17.88	0	0	0	0	225	216.918	0.0372574
10.1021/acscentsci.5b00149	3D carbon			h2so4	1	3741	2.2	0	0	0	0.987	1.18	20.11	0	0	0	0	0	0.216374	-
10.1021/acscentsci.5b00149	3D carbon			h2so4	1	3005	1.93	0	0	0	0.977	0.92	22.21	0	0	0	0	0	8.97315	-
10.1021/acscentsci.5b00149	3D carbon			h2so4	1	2619	1.63	0	0	0	0.941	1.6	30.03	0	0	0	0	0	-0.164158	-
10.1021/acscentsci.5b00149	3D carbon			h2so4	1	1548	0.96	0	0	0	0.936	1.17	23.62	0	0	0	0	0	2.29475	-
10.1021/acscentsci.5b00149	3D carbon			h2so4	1	2269	1.39	0	0	0	0.832	2.33	17.17	0	0	0	0	0	0.111487	-
10.1021/acsami.5b02453	porous carbon			koh	1	937	0	2.5	0	0	0	0	0	0	0	0	0	0	-10.0194	-
10.1021/acsami.5b02453	porous carbon			koh	1	1690	0	2.3	0	0	0	0	0	0	0	0	0	0	7.799	-
10.1021/acsami.5b02453	porous carbon			koh	1	2340	0	2.7	0	0	0	0	0	0	0	0	0	280	268.332	0.0434838
10.1039/c5nj02080h	N-doped AC		SC	koh	1	300	0.35	0	0	0	0	6.88	5.95	0	0	0	1.12	114	114.298	0.00260608
10.1039/c5nj02080h	N-doped AC		SC1	koh	1	1098.5	0.61	0	0	0	0	5.97	12.76	0	0	0	0.98	332	332.016	4.67721e-05
10.1039/c5nj02080h	N-doped AC		SC2	koh	1	1134.2	0.66	0	0	0	0	4.83	13.9	0	0	0	0.78	310	309.693	0.000991038
10.1039/c5nj02080h	N-doped AC		SC4	koh	1	871.7	0.55	0	0	0	0	3.42	17.69	0	0	0	0.41	234	233.939	0.00026124
10.1039/c5nj02080h	N-doped AC			emibf4	3	1098.5	0.61	0	0	0	0	5.97	12.76	0	0	0	0.98	120	119.943	0.000479352
10.1007/s10800-015-0840-1	CDC			koh	1	1489	0.646	1.14	0.554	0	2.37	0	0	0	0	0	0	191	180.24	0.0597007
10.1007/s10800-015-0840-1	CDC			koh	1	1684	1.162	0	0.203	0	1.46	0	0	0	0	0	0	140	145.11	0.0352168
10.1149/2.0971509jes	AC			koh	1	1383	0.99	1.98	0.75	0	0	0	0	0	0	0	0	125	108.011	0.157286
10.1149/2.0971509jes	carbon			koh	1	1651	1.14	2.87	0.19	0	0	0	0	0	0	0	0	160	164.574	0.0277959
10.1149/2.0971509jes	carbon			koh	1	2859	1.39	2	0.89	0	0	0	0	0	0	0	0	272	296.8	0.0835573
10.1021/am5087374	porous carbon	CNT		h2so4	0.9	44	0.21	0	0	0	0	0	0	0	0	0	0	0	-7.4759	-
10.1021/am5087374	porous carbon	CNT		h2so4	0.9	498	0.3	0	0.17	418	0	0	0	0	0	0	0	0	63.5938	-
10.1021/am5087374	porous carbon	CNT		h2so4	0.9	549	0.32	0	0.2	493	0	0	0	0	0	0	0	0	14.993	-
10.1021/am5087374	porous carbon	CNT		h2so4	0.9	609	0.31	0	0.24	563	0	0	0	0	0	0	0	0	-4.58905	-
10.1021/am5087374	porous carbon	CNT		h2so4	0.9	818	0.34	0	0.28	757	0	0	0	0	0	0	0	0	-8.53817	-
10.1021/am5087374	porous carbon	CNT		h2so4	0.9	998	0.99	0	0.3	739	0	0	0	0	0	0	0	0	13.7242	-
10.1021/am5087374	porous carbon	CNT		h2so4	0.9	1059	0.82	0	0.35	886	0	0	0	0	0	0	0	0	-24.9464	-
10.1021/am5087374	porous carbon	CNT		h2so4	0.9	1042	0.65	0	0.37	933	0	0	0	0	0	0	0	0	-34.9528	-
10.1021/am5087374	porous carbon	CNT		h2so4	0.9	1014	0.56	0	0.37	941	0	0	0	0	0	0	0	0	14.6425	-
10.1021/am5087374	porous carbon	CNT		h2so4	0.9	1020	0.45	0	0.38	762	0	0	0	0	0	0	0	131.8	119.633	0.101704
10.1021/am5087374	porous carbon	CNT		h2so4	0.9	1240	0.79	0	0.47	1109	0	0	0	0	0	0	0	177.3	237.043	0.252036
10.1021/am5087374	porous carbon	CNT		h2so4	0.9	1598	0.81	0	0.61	1458	0	0	0	0	0	0	0	210.7	181.77	0.159159
10.1021/am5087374	porous carbon	CNT		h2so4	0.9	1705	0.82	0	0.75	1582	0	0	0	0	0	0	0	237	260.978	0.0918776
10.1021/am507999s	CNT	GO		h2so4	1	0	0	0	0	0	1.18	0	0	0	0	0	0	252	131.64	0.914315
10.1021/am507999s	CNT	GO		h2so4	1	0	0	0	0	0	1.01	0	0	0	0	0	0	0	101.979	-
10.1038/ncomms9503	NF-doped carbon			koh	1	1.9	0	0	0	0	1.01	9.89	5.75	0	0	0	0	153.3	158.322	0.0317192
10.1038/ncomms9503	NF-doped carbon			koh	1	1.4	0.015	0.55	0	0	0.88	8.76	4.24	0	0	0	0	189	230.466	0.179924
10.1038/ncomms9503	NF-doped carbon			h2so4	1	1.4	0.015	0.55	0	0	0.88	8.76	4.24	0	0	0	0	270	230.466	0.171537
10.1021/acs.nanolett.5b03923	3D graphene			h2so4	0.9	0	0	10	0	0	1.21	0	0.6	0	0	0	0	95	93.5193	0.0158329
10.1021/acs.nanolett.5b03923	3D graphene			h2so4	0.9	1591	2.62	5.5	0	0	2.51	0	4.62	0	0	0	0	303	295.013	0.0270729
10.1021/acsami.6b08845	CNT		hsSWNT	koh	1	950	0	1.2	0	0	0.09	0	5.35	0	0	0	0	98	83.9382	0.167526
10.1021/acsami.6b08845	CNT		SWNT	koh	1	805	0	1.2	0	0	0.09	0	5.3	0	0	0	0	91	87.6525	0.0381908
10.1039/c6ta01314g	N-doped porous carbon			koh	0.8	315	0.65	5.1	0	129	0	3.7	33.8	0	0	0	0	130	126.895	0.0244686
10.1039/c6ta01314g	N-doped porous carbon			koh	0.8	1087	0.6	1.2	0	801	0	7.5	28.2	0	0	0	0	310	310.367	0.00118262
10.1039/c6ta01314g	N-doped porous carbon			koh	0.8	1113	0.68	1.13	0	889	0	3.6	25.9	0	0	0	0	348	353.303	0.015009
10.1039/c6ta01314g	N-doped porous carbon			koh	0.8	1343	0.73	1.15	0	1039	0	2.1	16	0	0	0	0	250	249.881	0.000474395
10.1039/c6ta01314g	N-doped porous carbon			koh	0.8	2032	0.83	0.64	0	1735	0	3.6	26.7	0	0	0	0	362	362.054	0.000148325
10.1021/acs.chemmater.6b03964	BN-doped carbon	CNT	BNC-CNT	h2so4	1	690	1.53	0.7	0.137	0	0	10.8	6.9	6.9	0	0	0	213	213.614	0.00287643
10.1021/acs.chemmater.6b03964	BN-doped carbon		Bulk BNC	h2so4	1	814	1.4	0.6	0.182	0	0	11.6	10.1	9.6	0	0	0	427	427.366	0.000856813
10.1021/acs.chemmater.6b03964	cnt		CNT	h2so4	1	294	1.39	1.2	0.05	0	0	0	6.1	0	0	0	0	25	65.3847	0.617647
10.1021/acs.chemmater.6b03964	BN-doped carbon	graphene	BNC-G	h2so4	1	798	1.43	1	0.181	0	0	0	0	0	0	0	0	288	179.028	0.608691
10.1021/acs.chemmater.6b03964	graphene		G	h2so4	1	524	2.28	1.1	0.102	0	0	0	0	0	0	0	0	36	15.0434	1.39308
10.1021/acs.chemmater.6b03964	AC		YP50	h2so4	1	1566	0.82	1	0.63	0	0	0	0	0	0	0	0	127	107.729	0.178886
10.1021/acs.chemmater.6b03964	BN-doped carbon		BNC-CNT	teabf4	2.5	690	1.53	0.7	0.137	0	0	10.8	6.9	6.9	0	0	0	110	109.946	0.000493578
10.1021/acs.chemmater.6b03964	BN-doped carbon		Bulk BNC	teabf4	2.5	814	1.4	0.6	0.182	0	0	11.6	10.1	9.6	0	0	0	94	94.2038	0.00216328
10.1021/acs.chemmater.6b03964	cnt		CNT	teabf4	2.5	294	1.39	1.2	0.05	0	0	0	6.1	0	0	0	0	22	26.9988	0.185148
10.1021/acs.chemmater.6b03964	BN-doped carbon		BNC-G	teabf4	2.5	798	1.43	1	0.181	0	0	0	0	0	0	0	0	126	101.869	0.236881
10.1021/acs.chemmater.6b03964	graphene		G	teabf4	2.5	524	2.28	1.1	0.102	0	0	0	0	0	0	0	0	32.1	27.1007	0.184472
10.1021/acs.chemmater.6b03964	AC		YP50	teabf4	2.5	1566	0.82	1	0.63	0	0	0	0	0	0	0	0	87	48.3253	0.800299
10.1039/c6ta06337c	NS-doped porous carbon		450	h2so4	0.9	0	0	0	0	0	0.93	9.01	25	0	0.35	0	0	320	313.741	0.0199497
10.1039/c6ta06337c	NS-doped porous carbon		550	h2so4	0.9	1591	0.7	1.9	0	0	0.93	5.27	21	0	0.26	0	0	419	419.031	7.37432e-05
10.1039/c6ta06337c	NS-doped porous carbon		650	h2so4	0.9	3047	1.6	2.3	0	0	0.94	2.28	10	0	0.33	0	0	352	350.159	0.00525707
10.1039/c6ta06337c	NS-doped porous carbon		750	h2so4	0.9	3068	2	2.8	0	0	0.98	1.67	7	0	0.35	0	0	312	303.513	0.0279642
10.1039/c6ta06337c	NS-doped porous carbon		850	h2so4	0.9	0	0	0	0	0	1	0.81	7	0	0.32	0	0	239	224.745	0.0634277
10.1039/c6ta06337c	NS-doped porous carbon		450	koh	0.8	0	0	0	0	0	0.93	9.01	25	0	0.35	0	0	326	338.754	0.0376497
10.1039/c6ta06337c	NS-doped porous carbon		550	koh	0.8	1591	0.7	1.9	0	0	0.93	5.27	21	0	0.26	0	0	350	348.456	0.00443195
10.1039/c6ta06337c	NS-doped porous carbon		650	koh	0.8	3047	1.6	2.3	0	0	0.94	2.28	10	0	0.33	0	0	330	331.05	0.00317155
10.1039/c6ta06337c	NS-doped porous carbon		750	koh	0.8	3068	2	2.8	0	0	0.98	1.67	7	0	0.35	0	0	255	272.626	0.0646517
10.1039/c6ta06337c	NS-doped porous carbon		850	koh	0.8	0	0	0	0	0	1	0.81	7	0	0.32	0	0	237	247.55	0.0426174
10.1021/acsami.6b08511	carbon nanoparticle	rgo	11	koh	0.8	196.5	0	3.78	0	0	1.01	0	0	0	0	0	0	185	169.749	0.0898462
10.1021/acsami.6b08511	carbon nanoparticle	rgo	13	koh	0.8	192.7	0	3.78	0	0	0.98	0.89	9.39	0	0	0	0	310.8	273.957	0.134484
10.1021/acsami.6b08511	carbon nanoparticle	rgo	15	koh	0.8	133.2	0	3.37	0	0	0.76	1.76	14.7	0	0	0	0	240	266.173	0.0983294
10.1021/acsami.6b08511	rgo			koh	0.8	102.6	0	3.37	0	0	0.53	0	0	0	0	0	0	251.7	247.079	0.0187016
10.1002/cjoc.201600320	porous carbon			koh	0.9	1128.7	0.58	1.9	0.58	0	0.85	0.89	9.25	0	0.21	0	0	198.2	214.052	0.0740575
10.1002/cjoc.201600320	porous carbon			koh	0.9	1358.2	0.74	2.8	0.65	0	0.87	0.08	8.11	0	0.16	0	0	217.2	201.107	0.0800195
10.1002/cjoc.201600320	porous carbon			koh	0.9	1829.7	1.05	2.5	0.75	0	0.84	0.37	6.34	0	0.02	0	0	238.2	269.747	0.116951
10.1039/c6ra07825g	N-doped graphene		rSH	koh	1	102.6	0	3.9	0	0	1.1	5.5	6.8	0	0	0	0	160	164.216	0.0256741
10.1039/c6ra07825g	N-doped graphene		rRb	koh	1	423.2	0	3.9	0	0	1.1	5.9	9.6	0	0	0	0	378	374.199	0.0101575
10.1039/c6ra07825g	N-doped graphene		rDot	koh	1	290.5	0	3.9	0	0	1.1	6.3	11.5	0	0	0	0	270	302.59	0.107704
10.1021/acssuschemeng.5b00926	N-doped porous carbon		100	koh	1	145.4	0.09	2.4	0	145.4	1.16	1.49	7.33	0	0	0	0	12	27.5136	0.563852
10.1021/acssuschemeng.5b00926	N-doped porous carbon		102	koh	1	760.49	0.51	2.68	0	734.59	1.22	3.9	9.48	0	0	0	0	150	148.023	0.0133587
10.1021/acssuschemeng.5b00926	N-doped porous carbon		120	koh	1	584.98	1.07	7.31	0	370.73	1.25	0.92	7.38	0	0	0	0	148	158.185	0.064384
10.1021/acssuschemeng.5b00926	N-doped porous carbon		121	koh	1	945.76	1.39	5.89	0	778.15	1.34	5.59	6.91	0	0	0	0	260	260.383	0.00147275
10.1021/acssuschemeng.5b00926	N-doped porous carbon		122	koh	1	805.58	0.68	3.38	0	632.54	1.51	8.34	9.24	0	0	0	0	323	321.224	0.00553029
10.1021/acssuschemeng.5b00926	N-doped porous carbon			koh	1	718.57	0.64	3.57	0	0	0	9.46	0	0	0	0	0	185	164.691	0.123313
10.1021/acssuschemeng.5b00926	N-doped porous carbon			koh	1	1187.35	1.07	3.62	0	0	0	2.66	0	0	0	0	0	110	104.405	0.0535882
10.1002/adfm.201602459	porous carbon			et4nbf4	4	1940	2.79	5.8	0.47	0	0	0	0	0	0	0	0	125	125.159	0.00127347
10.1039/c6ra18246a	porous carbon		bgc	koh	1	1096	0	0	0	0	1.005	0	0	0	0	0	0	110	100.908	0.0901025
10.1039/c6ra18246a	porous carbon		nac	koh	1	1171	0	0	0	0	0.98	0	0	0	0	0	0	168	168.241	0.00143145
10.1039/c6ra18246a	porous carbon		bngc	koh	1	998	0	0	0	0	0.95	0	0	0	0	0	0	208	185.126	0.123561
10.1002/ cssc.201600426	AC		hg240-kb6	h2so4	1	3050	2.1	0	0.96	0	0	4.16	6.63	0	0	0	0	246	246.155	0.000631209
10.1002/ cssc.201600426	carbon		hg180-koh	h2so4	1	3400	2.4	0	1.09	0	0	1.4	4.8	0	0	0	0	270	269.928	0.000268092
10.1002/ cssc.201600426	carbon		hg240-kb6	li2so4	1.6	3050	2.1	0	0.96	0	0	4.16	6.63	0	0	0	0	169	185.983	0.0913151
10.1002/ cssc.201600426	carbon		hg180-koh	li2so4	1.6	3400	2.4	0	1.09	0	0	1.4	4.8	0	0	0	0	184	177.562	0.0362593
10.1002/ cssc.201600426	carbon		hg240-kb6	pure emimbf4	3	3050	2.1	0	0.96	0	0	4.16	6.63	0	0	0	0	138	136.395	0.0117642
10.1002/ cssc.201600426	carbon		hg180-koh	pure emimbf4	3	3400	2.4	0	1.09	0	0	1.4	4.8	0	0	0	0	136	143.592	0.0528746
10.1002/ cssc.201600426	carbon		hg240-kb6	emimbf4	3	3050	2.1	0	0.96	0	0	4.16	6.63	0	0	0	0	154	136.395	0.12907
10.1002/ cssc.201600426	carbon		hg180-koh	emimbf4	3	3400	2.4	0	1.09	0	0	1.4	4.8	0	0	0	0	161	143.592	0.121229
10.1039/c6ra06424h	porous carbon			koh	1	679	1.63	1	0	0	0.83	0	0	0	0	0	0	306	280.581	0.0905951
10.1039/c6ra16153g	n-doped carbon	graphene		h2so4 pva	1	239	0.54	2.7	0	0	0	0	0	0	0	0	0	49	22.33	1.19436
10.1039/c6ra16153g	n-doped carbon	graphene		h2so4 pva	1	207	0.38	2.1	0	0	0	2	2.6	0	0	0	0	53	134.688	0.606499
10.1039/c6ra16153g	n-doped carbon			h2so4 pva	1	421	0	3.9	0	0	0	0	0	0	0	0	0	25	62.0294	0.596965
10.1039/c6ra16153g	n-doped carbon			h2so4 pva	1	521	0	4	0	0	0	0	0	0	0	0	0	18	30.783	0.415262
10.1039/c6ra20373f	AC			koh	1	42.7	0.03	0	0.03	0	0	0.5	13.8	0	1	0	0	57.2	30.6165	0.868275
10.1039/c6ra20373f	AC			koh	1	1537	0.83	0	0.53	0	0	0	5.8	0	1.2	0	0	201.3	208.681	0.0353687
10.1039/c6ra20373f	AC			koh	1	2359	1.3	0	0.6	0	0	0	6	0	1	0	0	370.1	334.431	0.106654
10.1039/c6ra20373f	AC			koh	1	2422	1.4	0	0.37	0	0	0	8.5	0	1.1	0	0	330.2	319.991	0.0319049
10.1039/c6ra20373f	AC			koh	1	1422	0.8	0	0.32	0	0	0	5.6	0	0.9	0	0	220	203.401	0.081609
10.1039/c6ra20373f	AC			h2so4	1	42.7	0.03	0	0.03	0	0	0.5	13.8	0	1	0	0	0	30.6165	-
10.1039/c6ra20373f	AC			h2so4	1	1537	0.83	0	0.53	0	0	0	5.8	0	1.2	0	0	218.3	208.681	0.0460955
10.1039/c6ra20373f	AC			h2so4	1	2359	1.3	0	0.6	0	0	0	6	0	1	0	0	294.2	334.431	0.120298
10.1039/c6ra20373f	AC			h2so4	1	2422	1.4	0	0.37	0	0	0	8.5	0	1.1	0	0	314	319.991	0.0187216
10.1039/c6ra20373f	AC			h2so4	1	1422	0.8	0	0.32	0	0	0	5.6	0	0.9	0	0	169.4	203.401	0.167161
10.1039/c5ra23735a	N-doped AC			koh	1	443.106	0.238	2.145	0.174	0	0	0	0	0	0	0	0	85	163.999	0.481705
10.1039/c5ra23735a	N-doped AC			koh	1	1844.4	0.988	2.144	0.481	0	0	0	0	0	0	0	0	140	162.362	0.137732
10.1039/c5ra23735a	N-doped AC			koh	1	1204.14	0.514	3.021	0.242	0	0	0	0	0	0	0	0	160	97.3563	0.643449
10.1039/c5ra23735a	N-doped AC			koh	1	2216.76	1.443	2.605	0.386	0	0	0	0	0	0	0	0	230	174.207	0.320266
10.1039/c5ra23735a	N-doped AC			koh	1	2324.36	1.215	2.092	0.566	0	0	0	0	0	0	0	0	185	156.642	0.181036
10.1021/acssuschemeng.7b02488	porous carbon			h2so4	0.8	241	0.35	3.13	0	89	0	0	0	0	0	0	0	50	54.8941	0.0891554
10.1021/acssuschemeng.7b02488	porous carbon			h2so4	0.8	253	0.27	4.04	0	105	0	0	0	0	0	0	0	67	108.971	0.385156
10.1021/acssuschemeng.7b02488	porous carbon			h2so4	0.8	264	0.54	4.88	0	110	0	0	0	0	0	0	0	140	97.5095	0.435757
10.1021/acssuschemeng.7b02488	porous carbon			h2so4	0.8	1339	0.76	2.27	0	606	0	0	0	0	0	0	0	186	158.539	0.173215
10.1021/acssuschemeng.7b02488	porous carbon			h2so4	0.8	2076	1.2	2.22	0	792	0	0	0	0	0	0	0	266	277.875	0.0427347
10.1021/acssuschemeng.7b02488	porous carbon			h2so4	0.8	1652	0.92	2.23	0	721	0	0	0	0	0	0	0	190	157.703	0.204796
10.1039/c7ra07984b	N-doped porous carbon			koh	1	1264	0.56	0.8	0.4	0	1.01	9.2	15.5	0	0	0	0	236	231.634	0.0188495
10.1039/c7ra07984b	N-doped porous carbon			koh	1	1803	0.8	1.1	0.57	0	0.98	6.5	15.8	0	0	0	0	285	310.916	0.0833549
10.1039/c7ra07984b	N-doped porous carbon			koh	1	2695	1.2	1.1	0.61	0	1.02	3.4	17.5	0	0	0	0	263	263.617	0.00234218
10.1039/c7ra07984b	N-doped porous carbon			koh	1	1438	0.82	0.9	0.44	0	0.91	0.6	11.9	0	0	0	0	248	199.044	0.245957
10.1039/c6ta07927j	AC	CNT		pure emimbf4	4	1921.7	1.47	3.06	0.394	814.6	1.905	0.93	6.4	0	0	0	0	307.9	307.928	9.21614e-05
10.1039/c6ta07927j	AC	CNT		pure emimbf4	4	2855.7	1.58	2.21	0.232	630.9	1.74	0.51	5.07	0	0	0	0	344.1	344.069	9.01352e-05
10.1039/c7gc00506g	porous carbon			koh	1	1290	0.59	0	0.55	0	0.88	0.6	3.3	0	0	0	0	289	307.325	0.0596272
10.1039/c7gc00506g	porous carbon			koh	1	1355	0.62	0	0.56	0	0.9	0.7	4.4	0	0	0	0	354	336.664	0.0514945
10.1039/c7gc00506g	porous carbon			koh	1	1660	0.78	0	0.66	0	0.94	0.7	4.7	0	0	0	0	420	402.725	0.0428963
10.1039/c7gc00506g	porous carbon			pure emitfsi	2.5	1290	0.59	0	0.55	0	0.88	0.6	3.3	0	0	0	0	130	109.939	0.182473
10.1039/c7gc00506g	porous carbon			pure emitfsi	2.5	1355	0.62	0	0.56	0	0.9	0.7	4.4	0	0	0	0	152	143.345	0.0603751
10.1039/c7gc00506g	porous carbon			pure emitfsi	2.5	1660	0.78	0	0.66	0	0.94	0.7	4.7	0	0	0	0	218	219.071	0.00488994
10.1021/acsami.7b09801	N-doped porous carbon		600	h2so4	1	1009	0.52	2	0	0	0.96	7.18	6.57	0	0	0	0	277	314.952	0.120502
10.1021/acsami.7b09801	N-doped porous carbon		650	h2so4	1	1245	0.67	2.1	0	0	1.02	5.72	6.05	0	0	0	0	292	331.445	0.119009
10.1021/acsami.7b09801	N-doped porous carbon		700	h2so4	1	1638	0.89	2.2	0	0	1.45	4.36	5.29	0	0	0	0	302	292.175	0.0336266
10.1021/acssuschemeng.7b00058	porous carbon			pure emitfsi	3.4	1089	0.48	0	0	0	2.21	0	7	0	1	0	0	135	134.62	0.00282305
10.1021/acssuschemeng.7b00058	porous carbon			pure emitfsi	3.4	1230	0.51	0	0	0	2.38	0	8	0	1	0	0	125	125.172	0.00137663
10.1021/acssuschemeng.7b00058	porous carbon			pure emitfsi	3.4	1263	0.54	0	0	0	1.97	0	8	0	0	0	0	125	126.116	0.00885056
10.1021/acssuschemeng.7b00058	porous carbon			pure emitfsi	3.4	1886	0.86	0	0	0	2	0	8	0	0	0	0	231	227.425	0.0157187
10.1021/acsami.7b07058	porous carbon			cscl	1.2	742	0.48	0	0.19	113	0	0	0	0	0	0	0	56	16.9244	2.30882
10.1021/acsami.7b07058	porous carbon			cscl	1.2	991	0.59	0	0.29	250	0	0	0	0	0	0	0	68	75.5062	0.0994114
10.1039/c6nr08987a	CNT		mwcnt	h2so4	0.9	282	1.28	18.15	0.01	17.7	1.1	0	0	0	0	0	0	85.8	86.9094	0.0127648
10.1039/c6nr08987a	N-doped porous carbon		npc L	h2so4	0.9	999.7	0.79	3.17	0.27	660.8	1.72	10.193	4.335	0	0	0	0	166.7	182.843	0.0882873
10.1039/c6nr08987a	N-doped porous carbon	CNT	mwcnt npc m	h2so4	0.9	898.6	0.57	2.53	0.31	662.8	0	0	0	0	0	0	0	155.7	176.926	0.119969
10.1039/c6nr08987a	N-doped porous carbon	CNT	s	h2so4	0.9	642.5	0.53	2.22	0.21	548.8	1.53	10.969	4.735	0	0	0	0	192.1	207.615	0.0747307
10.1039/c6nr08987a	N-doped porous carbon	CNT	m	h2so4	0.9	884.6	0.57	2.57	0.29	748.9	1.53	10.081	3.52	0	0	0	0	222.6	212.592	0.047075
10.1039/c6nr08987a	N-doped porous carbon	CNT	l	h2so4	0.9	928.2	0.64	2.74	0.28	691.8	1.53	10.454	2.492	0	0	0	0	293.4	284.9	0.0298362
10.1002/ chem.201702544	porous carbon		Apct	koh	1	1325	0.884	1.33	0.537	0	1.02	1.17	8.1	0	0	0	0	159	141.822	0.121127
10.1002/ chem.201702544	porous carbon		apcs	koh	1	1417	1.56	2.22	0.598	0	1.01	1.99	10.13	0	0	0	0	190	229.265	0.171265
10.1002/ chem.201702544	porous carbon		apcspct	koh	1	1684	1.57	1.86	0.705	0	1.008	1.15	4.43	0	0	0	0	224	214.005	0.0467049
10.1021/acsami.7b03368	porous carbon	CNT	HPCF1	koh	1	330.2	0.44	3	0	0	0	0	6.47	0	0	0	0	177.4	227.764	0.221122
10.1021/acsami.7b03368	porous carbon	CNT	HPCF2	koh	1	449.3	0.53	3.39	0	0	0	0	5.42	0	0	0	0	249.4	293.634	0.150643
10.1021/acsami.7b03368	porous carbon	CNT	HPCF3	koh	1	524.9	0.56	3.75	0	0	0	0	3.83	0	0	0	0	356.1	320.442	0.111276
10.1021/acsami.7b03368	porous carbon	CNT	HPCF4	koh	1	620.1	0.63	3.94	0	0	0	0	2.52	0	0	0	0	381.2	273.875	0.391877
10.1021/acsami.7b03368	porous carbon	CNT	HPCF5	koh	1	569.3	0.61	3.73	0	0	0	0	2.1	0	0	0	0	323.7	260.96	0.240422
10.1021/acsami.7b03368	porous carbon		PCF4	koh	1	681.3	0.51	5.34	0	0	0	0	0	0	0	0	0	215.8	126.322	0.708333
10.1038/srep40259	N-doped porous carbon	CNT	ACM-1	h2so4	1	4.7	0.026	27.2	0.002	0	3.91	17.2	3.6	0	0	0	0	10	7.31818	0.366461
10.1038/srep40259	N-doped porous carbon	CNT	ACM-2	h2so4	1	8.1	0.032	26.1	0.004	0	3.46	12.8	4.7	0	0	0	0	0	-2.74349	-
10.1038/srep40259	N-doped porous carbon	CNT	ACM-3	h2so4	1	13.7	0.025	33.3	0.005	0	3.54	12.4	3	0	0	0	0	0	-1.98979	-
10.1038/srep40259	N-doped porous carbon	CNT	ACM-4	h2so4	1	187.5	0.17	3.08	0.067	0	3.32	9.2	2.4	0	0	0	0	75.6	79.6855	0.0512704
10.1038/srep40259	N-doped porous carbon	CNT	ACM-5	h2so4	1	551.2	0.317	2.93	0.217	0	3.36	3.1	3.2	0	0	0	0	184	204.848	0.101773
10.1038/srep40259	N-doped porous carbon	CNT	ACMCNT-6	h2so4	1	8.5	0.011	16.4	0.005	0	2.69	15.8	3.2	0	0	0	0	58	67.7753	0.144231
10.1038/srep40259	N-doped porous carbon	CNT	ACMCNT-7	h2so4	1	613.8	0.366	3.09	0.237	0	2.38	9	6.3	0	0	0	0	216	174.254	0.239568
10.1186/s11671-017-2151-4	porous carbon	AC	cgcf	koh	1	252	0.12	0	0.1	239	0.97	0	0	0	0	0	0	0	-1.29887	-
10.1186/s11671-017-2151-4	porous carbon		cgacf	koh	1	1435	0.87	0	0.42	852	0.87	0	0	0	0	0	0	218	263.91	0.17396
10.1186/s11671-017-2151-4	AC			koh	1	1282	0.58	0	0.48	1192	0	0	0	0	0	0	0	175	221.286	0.209168
10.1039/c6ra26141h	porous carbon		A-NSC	koh	1	2385	1.36	3.53	0	1173	0.8	0	8.3	0	0	0	0	294	284.403	0.0337442
10.1039/c6ra26141h	porous carbon		A-N-MSC1	koh	1	2795	1.58	3.39	0	1140	0.84	0.95	7.1	0	0	0	0	360	350.672	0.0266005
10.1039/c6ra26141h	porous carbon		A-N-MSC2	koh	1	3003	1.62	2.56	0	1278	0.86	1.7	5.79	0	0	0	0	390	390.102	0.000260943
10.1039/c6ra26141h	porous carbon		NSC	koh	1	10.81	0	0	0	0	0	0	22.3	0	0	0	0	0	63.0278	-
10.1039/c6ra26141h	porous carbon		N-MCS1	koh	1	0.93	0	0	0	0	0	2.78	17.51	0	0	0	0	0	4.85312	-
10.1039/c6ra26141h	porous carbon		N-MCS2	koh	1	0.19	0	0	0	0	0	4.24	16.06	0	0	0	0	0	-26.3151	-
10.1039/c6ra26141h	porous carbon		A-H-MSC	koh	1	1789	0.99	3.2	0	825	0	0	0	0	0	0	0	0	58.1808	-
10.1039/c6ra26141h	porous carbon		A-Na-MSC	koh	1	1630	0.81	3.35	0	1207	0	0	0	0	0	0	0	0	-0.845789	-
10.1039/c7ta05512a	porous carbon			h2so4	1	1467.5	0	0.7	0	0	0.72	0	0	0	0	0	0	243.7	290.768	0.161876
10.1039/c7ta05512a	porous carbon			emimbf4	3	1467.5	0	0.7	0	0	0.72	0	0	0	0	0	0	121	114.321	0.0584239
10.1039/c7ta05710e	N-doped porous carbon	graphene		koh	1	498.5	0.941	1.1	0.127	0	0.71	4.11	15.93	0	0	0	0	238	213.29	0.115854
10.1039/c7ta05710e	N-doped porous carbon			koh	1	665	0.626	1.2	0.23	0	1.01	5.82	11.88	0	0	0	0	175	176.759	0.00994903
10.1039/c7nj01127j	porous carbon		700	h2so4	1	847.9	0.44	5.181	0.371	0	0.92	1.45	25.07	0	0	0	0	220	220.675	0.00305995
10.1039/c7nj01127j	porous carbon		800	h2so4	1	891.8	0.613	4.017	0.366	0	0.8	0.96	18.74	0	0	0	0	272	280.256	0.0294597
10.1039/c7nj01127j	porous carbon		900	h2so4	1	878.2	0.537	3.981	0.37	0	0.78	1.02	15.88	0	0	0	0	250	254.584	0.0180043
10.1039/c7nj01127j	porous carbon		u800	h2so4	1	1776.9	0.993	4.441	0.763	0	0.92	2.65	16.34	0	0	0	0	306.5	305.126	0.00450341
10.1021/acs.nanolett.7b00533	porous carbon			koh	0.8	143.5	1.036	0	0.024	0	0	4.12	0	0	0	0	0	142.3	128.138	0.110522
10.1021/acs.nanolett.7b00533	porous carbon			koh	0.8	2905.6	4.337	0.62	0.93	0	0.94	1.95	8.6	0	0	0	0	374.7	374.154	0.00145921
10.1038/ncomms15717	porous carbon		MDC	koh	1	1536	1.23	0	0.39	894	0	0	0	0	0	0	0	222	174.157	0.274712
10.1038/ncomms15717	porous carbon		OMC	koh	1	779	0.57	0	0.28	379	0	0	0	0	0	0	0	110	145.562	0.244308
10.1038/ncomms15717	porous carbon		MDC-OMC	koh	1	1021	1.62	0.5	0.16	367	0	0	0	0	0	0	0	249	270.878	0.0807684
10.1038/ncomms15717	porous carbon		MDC/OMC	koh	1	1080	0.8	0	0.42	600	0	0	0	0	0	0	0	179	194.093	0.0777601
10.1038/ncomms15717	porous carbon		MDC-OMC	teabf4 AN	2.5	1021	1.62	0.5	0.16	367	0	0	0	0	0	0	0	135	135.342	0.00253049
10.1021/acs.chemmater.7b00857	N-doped porous carbon		ptct-c	koh	1	1280	1.82	0.71	1.64	0	0	6.07	0	0	0	0	0	550	551.301	0.00235907
10.1021/acs.chemmater.7b00857	N-doped porous carbon		ptca-c	koh	1	790	1.82	0.93	1.31	0	0	3.6	0	0	0	0	0	380	378.119	0.00497362
10.1021/acs.chemmater.7b00857	N-doped porous carbon		pbcp-c	koh	1	910	2.24	0.94	1.98	0	0	2.99	0	0	0	0	0	300	300.743	0.00247052
10.1021/acssuschemeng.6b03183	N-doped porous carbon			nacl	1	910	3.49	0	0.13	269	1.01	3.1	0	0	0	0	0	204	206.458	0.011907
10.1021/acssuschemeng.6b03183	N-doped porous carbon			nacl	1	534	2.5	0	0.15	349	0.97	0	0	0	0	0	0	150	144.994	0.0345221
10.1002/smll.201700834	N-doped carbon nanobelt			koh	1	358.6	0.246	0	0.051	0	1.1	15.9	1.6	0	0	0	0	449	480.588	0.0657282
10.1002/smll.201700834	N-doped carbon nanobelt			koh	1	392.9	0.253	0	0.057	0	1.1	16.8	2.3	0	0	0	0	476	447.702	0.0632079
10.1002/smll.201700834	N-doped carbon nanobelt			koh	1	24.7	0.029	0	0.008	0	0	5.3	2.5	0	0	0	0	0	-12.8104	-
10.1002/smll.201700834	N-doped carbon nanobelt			koh	1	446.3	0.283	0	0.076	0	1.04	8	6.4	0	0	0	0	385	346.709	0.110441
10.1039/c7ra07003a	N-doped porous carbon			h2so4	0.8	722	0.493	2.73	0	0	0	2.8	7	0	0	0	0	175	165.445	0.0577548
10.1039/c7ra07003a	N-doped porous carbon			h2so4	0.8	1600	0.862	2.16	0	0	0	2.6	11	0	0	0	0	270	245.43	0.10011
10.1002/cjoc.201600785	AC			koh	1	1098.1	0	0	0	0	0	0	0	0	0	0	0	60	53.0146	0.131763
10.1039/c5nr05151g	N-doped carbon	rgo		koh	1	1349	0.9	2.6	0.6	1216	0.91	9	8.5	0	0	0	0	190	185.199	0.0259246
10.1039/c5nr05151g	N-doped carbon	rgo		koh	1	2502	1.7	2.7	1.1	2189	0.94	6.3	9.2	0	0	0	0	341	343.09	0.00609258
10.1039/c5nr05151g	N-doped carbon			koh	1	2360	1.3	2.2	1.1	2237	0.88	8.5	8	0	0	0	0	260	259.982	7.0167e-05
10.1039/c5nr05151g	rgo			koh	1	505	1	15.8	0.1	0	0	0	4.3	0	0	0	0	150	152.558	0.016768
10.1002/celc.201500516	carbon		G-DEB-TPA	koh	1	1015	0	0	0	0	0	0	0	0	0	0	0	0	53.839	-
10.1002/celc.201500516	carbon		G-DEB-C	koh	1	526	0	0	0	0	0	0	0	0	0	0	0	0	59.5265	-
10.1002/celc.201500516	carbon		G-DEF-TPA	koh	1	643	0	0	0	0	0	0	0	0	0	0	0	0	58.4733	-
10.1002/celc.201500516	carbon		G-DEF-C	koh	1	779	0	0	0	0	0	0	0	0	0	0	0	0	57.1187	-
10.1002/celc.201500516	carbon		G-TEPA-TPA	koh	1	926	0	0	0	0	0	0	0	0	0	0	0	0	55.0512	-
10.1002/celc.201500516	carbon		G-TEPA-C	koh	1	861	0	0	0	0	0	0	0	0	0	0	0	0	56.0002	-
10.1002/celc.201500516	carbon		G-DEB-TPA-C	koh	1	719	0	0	0	0	0.95	0	0	0	0	0	0	216	198.704	0.0870422
10.1002/celc.201500516	carbon		G-DEB-C-C	koh	1	239	0	0	0	0	0.98	0	0	0	0	0	0	58	91.0399	0.362917
10.1002/celc.201500516	carbon		G-DEF-TPA-C	koh	1	552	0	0	0	0	0.99	0	0	0	0	0	0	90	147.694	0.390631
10.1002/celc.201500516	carbon		G-DEF-C-C	koh	1	467	0	0	0	0	1.01	0	0	0	0	0	0	133	124.863	0.065167
10.1002/celc.201500516	carbon		G-TEPA-TPA-C	koh	1	764	0	0	0	0	0.99	0	0	0	0	0	0	241	216.905	0.111087
10.1002/celc.201500516	carbon		G-TEPA-C-C	koh	1	493	0	0	0	0	0.99	0	0	0	0	0	0	148	123.19	0.201395
10.1039/c5ra26263a	porous carbon			koh	1	951.7	0.46	1.48	0.38	822.7	1.64	0	0	0	0	0	0	114	116.796	0.0239418
10.1039/c5ra26263a	porous carbon			koh	1	1379.4	0.69	1.48	0.49	1062.1	1.91	0	0	0	0	0	0	126	162.739	0.225753
10.1039/c5ra26263a	porous carbon			koh	1	1636.2	0.74	1.48	0.58	1218.1	1.92	0	0	0	0	0	0	133	134.564	0.0116235
10.1039/c5ra26263a	porous carbon			koh	1	1748.2	0.83	1.59	0.58	1286.6	1.93	0	0	0	0	0	0	149	113.304	0.315048
10.1039/c5ra26263a	porous carbon			koh	1	2006.9	0.92	1.36	0.49	1104.7	1.95	0	0	0	0	0	0	174	176.989	0.0168903
10.1039/c5ra26263a	porous carbon			koh	1	2178.2	1.01	1.59	0.43	1004.5	1.97	0	0	0	0	0	0	206	172.404	0.194867
10.1039/c5ra26263a	porous carbon			koh	1	1420.2	0.69	1.48	0.48	1110.6	0	0	0	0	0	0	0	0	-50.1812	-
10.1002/adma.201600586	AC		PG-0		0	17.8	0	10.5	0	0	1	3.08	7.32	0	0	0	0	0	-14.5391	-
10.1002/adma.201600586	AC	rgo	aPG-2		0	800	0	0.56	0	0	1	1.94	6.91	0	0	0	0	0	20.0579	-
10.1002/adma.201600586	AC	rgo	aPG-5		0	1180	0	0.58	0	0	1	1.53	4.66	0	0	0	0	0	-7.7432	-
10.1002/adma.201600586	rgo		aGO-10		0	1165	0	0.9	0	0	1	0	0	0	0	0	0	0	-2.84313	-
10.1002/adma.201600586	AC	rgo	aPG-10	koh	0.8	2582	0	0.48	0	0	1	1.27	8.66	0	0	0	0	227	226.235	0.00338166
10.1002/adma.201600586	AC	rgo	aPG-10	teabf4/AN	3.5	2582	0	0.48	0	0	1	1.27	8.66	0	0	0	0	188	188.077	0.000406971
10.1038/srep31555	N-doped graphene			koh	1	190.38	0.88	4.01	0	0	1	3.2	11.3	0	0	0	0	290	279.901	0.0360818
10.1038/srep31555	N-doped graphene			koh	1	171.56	0.68	3.95	0	0	0.5	2.9	6.4	0	0	0	0	270	223.123	0.210095
10.1007/s10853-015-9660-2	CNT			koh	0.8	150	0.417	1	0	0	0	0	0	0	0	0	0	11	-18.0075	-1.61086
10.1007/s10853-015-9660-2	CNT			koh	0	223	0.422	1	0	0	0	0	0	0	0	0	0	21	35.4867	0.408229
10.1007/s10853-015-9660-2	CNT			koh	0	251	0.486	1	0	0	0	0	0	0	0	0	0	26	35.436	0.266283
10.1007/s10853-015-9660-2	CNT			koh	0	296	0.805	1	0	0	0	0	0	0	0	0	0	4	-14.4673	-1.27649
10.1002/smll.201600974	CNT		0		0	0	0	0	0	0	0	0	5.5	0	0	0	0	0	8.36662	-
10.1002/smll.201600974	CNT		1		0	0	0	0	0	0	0	0	9.8	0	0	0	0	0	24.3951	-
10.1002/smll.201600974	CNT		4		0	0	0	0	0	0	0	1	13.5	0	0	0	0	0	-13.2066	-
10.1002/smll.201600974	CNT		2		0	0	0	0	0	0	0	5.4	13.1	0	0	0	0	0	6.3118	-
10.1021/acsami.6b02404	N-doped porous carbon		N-HMCS-2	h2so4	0.8	2359	2.23	2.7	0	0	0	1.9	11.9	0	0	0	0	240	242.564	0.0105685
10.1021/acsami.6b02404	N-doped porous carbon		YSHMCNs-2	h2so4	0.8	1061	2.04	4.2	0	0	0	1.9	17.5	0	0	0	0	169	160.212	0.0548503
10.1039/c5ta10170k	B-doped carbon		BC-MS-700-14	h2so4	1	1460	1.7678	0	0.428	0	0.96	0	0	0	0	0	0	160	152.238	0.0509858
10.1002/chem.201602922	N-doped porous carbon			koh	1	1415	1.4	3.96	0	1040	0.88	3.47	12.7	0	0	0	0	289	289.523	0.00180605
10.1002/chem.201602922	N-doped porous carbon			koh	1	170	0.2	8.37	0	108	0.8	0	0	0	0	0	0	96	82.4112	0.16489
10.1002/chem.201602922	N-doped porous carbon			koh	1	306	0.31	5.5	0	173	0.76	0	0	0	0	0	0	137	173.616	0.210903
10.1002/chem.201602922	N-doped porous carbon			koh	1	654	0.49	4.38	0	293	0.67	5.89	8.63	0	0	0	0	243	194.886	0.246884
10.1039/c5ra22527b	CNT			lipf6	3	214.3	1.28	0	0.08	0	1.2	0	0.3	0	0	0	0	32	30.4384	0.051303
10.1039/c5ra22527b	CNT			lipf6	3	627.8	1.36	0	0.23	0	1.47	0	5.5	0	0	0	0	0	17.2043	-
10.1039/c5ra22527b	CNT			lipf6	3	661.5	1.58	0	0.23	0	1.47	0	5.5	0	0	0	0	0	5.95309	-
10.1039/c5ra22527b	CNT			lipf6	3	1123.2	2.38	0	0.4	0	1.47	0	5.5	0	0	0	0	145	135.886	0.0670732
10.1039/c6ta08868f	porous carbon			emimbf4	3.5	3550	1.78	0	0	1349	0	0	0	0	0	0	0	150	151.581	0.0104282
10.1039/c6ta08868f	AC			emimbf4	3.5	1740	0.6	0	0	1548.6	0	0	0	0	0	0	0	62	65.7126	0.0564972
10.1039/c6ta08868f	porous carbon			lipf6 EC/DMC	3	3550	1.78	0	0	1349	0	0	0	0	0	0	0	216	215.614	0.00179063
10.1039/c6nr02155g	carbon nanosheet			koh	1	773	0.68	0.5	0	462	2.95	0	3.6	0	0	0	0	142	142.966	0.00675941
10.1039/c6nr02155g	carbon nanosheet			koh	1	1766	1.45	0.5	0	573	2.5	0	3.6	0	0	0	0	220	214.279	0.0266967
10.1039/c6nr02155g	carbon nanosheet			koh	1	910	0.88	0.6	0	558	2.9	0	0	0	0	0	0	160	172.668	0.0733677
10.1039/c6ra13689c	NOP-doped porous carbon			koh	0.9	2335	1.32	2.6	0.95	0	1	1.1	11	0	0	0	1.6	315	314.824	0.000558832
10.1021/acsami.6b10893	AC			koh	1	2033	0.98	2	0.72	1530	0.99	0.8	5.6	0	0	0	0	374	374.559	0.00149238
10.1021/acsami.6b10893	AC			koh	1	2312	1.2	2.15	0.68	1743	0.98	1.4	4.5	0	0	0	0	355	354.77	0.000647862
10.1021/acsami.6b10893	AC			koh	1	1742	0.79	1.81	0.45	1196	0.88	1	6.3	0	0	0	0	266	333.517	0.202438
10.1021/acsami.6b10893	AC			koh	1	2345	1.03	1.78	0.86	2102	0	0	0	0	0	0	0	203	220.815	0.0806777
10.1021/acsami.6b10893	AC			koh	1	182	0.1	2.29	0.05	116	0	0	0	0	0	0	0	134	107.633	0.244969
10.1021/acs.iecr.5b00601	porous carbon			koh	1	1634.5	3.67	1.58	0	0	2.72	0	0	0	0	0	0	204.4	204.151	0.00121771
10.1021/acs.iecr.5b00601	porous carbon			koh	1	1972.1	4.78	1.65	0	0	2.55	0	0	0	0	0	0	236.5	236.428	0.000303905
10.1021/acs.iecr.5b00601	porous carbon			koh	1	1918.5	2.89	1.66	0	0	2.42	0	0	0	0	0	0	209.2	211.526	0.0109965
10.1039/c5ra07807e	porous carbon		hpc-6	koh	0.9	524	0.31	0.6	0.25	0	0.8	0	0	0	0	0	0	0	89.0082	-
10.1039/c5ra07807e	porous carbon		hpc-7	koh	0.9	637	0.37	0.6	0.31	0	0.82	0	0	0	0	0	0	0	62.8377	-
10.1039/c5ra07807e	porous carbon		hpc-8	koh	0.9	803	0.46	0.6	0.38	0	0.84	0	0	0	0	0	0	0	45.7647	-
10.1039/c5ra07807e	porous carbon		hpc-9	koh	0.9	1007	0.62	0.6	0.46	0	0.85	0	7.3	0	0	0	0	147.2	147.797	0.00403787
10.1039/c5ra07807e	porous carbon		hpc-10	koh	0.9	966	0.57	0.6	0.43	0	0.85	0	0	0	0	0	0	0	52.4474	-
10.1039/c5ra07807e	porous carbon		hpc-9d	koh	0.9	1549	0.81	0.6	0.61	0	0.86	0	8.5	0	0	0	0	175.2	208.251	0.158707
10.1039/c5ra07807e	porous carbon		MPC-9	koh	0.9	648	0.33	0.6	0.33	0	0.83	0	0	0	0	0	0	174.4	52.3966	2.32846
10.1039/c5ra07807e	porous carbon		hpc-6	teabf4 AN	2.7	524	0.31	0.6	0.25	0	0.8	0	0	0	0	0	0	0	25.7709	-
10.1039/c5ra07807e	porous carbon		hpc-7	teabf4 AN	2.7	637	0.37	0.6	0.31	0	0.82	0	0	0	0	0	0	0	4.05487	-
10.1039/c5ra07807e	porous carbon		hpc-8	teabf4 AN	2.7	803	0.46	0.6	0.38	0	0.84	0	0	0	0	0	0	0	-11.0631	-
10.1039/c5ra07807e	porous carbon		hpc-9	teabf4 AN	2.7	1007	0.62	0.6	0.46	0	0.85	0	7.3	0	0	0	0	38	43.66	0.129639
10.1039/c5ra07807e	porous carbon		hpc-10	teabf4 AN	2.7	966	0.57	0.6	0.43	0	0.85	0	0	0	0	0	0	0	7.38096	-
10.1039/c5ra07807e	porous carbon		hpc-9d	teabf4 AN	2.7	1549	0.81	0.6	0.61	0	0.86	0	8.5	0	0	0	0	115	100.674	0.142295
10.1039/c5ra07807e	porous carbon		MPC-9	teabf4 AN	2.7	648	0.33	0.6	0.33	0	0.83	0	0	0	0	0	0	1.9	-21.6619	-1.08771
10.1039/c5ra16104e	N-doped porous carbon		n-hpc	lipf6 EC/DMC	2.7	1290	3.04	0.7	0.3	400	0	3.6	0	0	0	0	0	101	115.174	0.123067
10.1039/c5ra16104e	N-doped porous carbon		hpc	lipf6 EC/DMC	2.7	1222	2.76	0.7	0.28	382	0	0	0	0	0	0	0	108	113.811	0.0510618
10.1039/c5ra16104e	N-doped porous carbon		yp-17d	lipf6 EC/DMC	2.7	1487	0.74	1	0.56	1356	0	0	0	0	0	0	0	90	71.5485	0.257888
10.1039/c5ra11179j	porous carbon			koh	1	1169.5	0.71	2.41	0	0	0	0	0	0	0	0	0	0	100.932	-
10.1039/c5ra11179j	porous carbon			koh	1	2121.9	1.21	2.28	0	0	0	0	0	0	0	0	0	0	3.22334	-
10.1039/c5ra11179j	porous carbon			koh	1	2548.6	1.54	2.42	0	0	0.96	0	0	0	0	0	0	239	224.3	0.0655386
10.1039/c5ra11179j	porous carbon			koh	1	1793.5	1.06	2.36	0	0	0	0	0	0	0	0	0	0	4.27157	-
10.1007/s10800-015-0850-z	porous carbon		600-2	koh	1	449	0.54	4.77	0.11	0	0	0	0	0	0	0	0	185	148.879	0.24262
10.1007/s10800-015-0850-z	porous carbon		700-2	koh	1	600	0.63	4.2	0.18	0	0	0	0	0	0	0	0	193	163.276	0.182051
10.1007/s10800-015-0850-z	porous carbon		800-2	koh	1	1018	1.07	4.18	0.27	0	0	0	0	0	0	0	0	233	281.294	0.171686
10.1007/s10800-015-0850-z	porous carbon		900-2	koh	1	1066	1.48	5.57	0.11	0	0	0	0	0	0	0	0	168	191.711	0.123682
10.1007/s10800-015-0850-z	porous carbon		800-1.5	koh	1	866	0.83	3.81	0.21	0	0	0	0	0	0	0	0	189	229.3	0.175753
10.1007/s10800-015-0850-z	porous carbon		800-2.5	koh	1	1456	1.35	3.7	0.38	0	1.02	0	0	0	0	0	0	245	221.449	0.106351
10.1007/s10800-015-0850-z	porous carbon		800-3	koh	1	971	0.99	4.07	0.26	0	0	0	0	0	0	0	0	236	269.99	0.125892
10.1039/c5ra05688h	porous carbon			koh	0.9	943	0.44	1.9	0	0	1.15	2.06	23.32	0	0	0	0	232	215.578	0.0761791
10.1039/c5ra05688h	porous carbon			koh	0.9	1177	0.55	1.89	0	0	1.27	1.88	21.89	0	0	0	0	267	272.436	0.0199539
10.1039/c5ra05688h	porous carbon			koh	0.9	1733	0.86	1.97	0	0	1.38	1.64	18.98	0	0	0	0	304	286.218	0.0621276
10.1039/c5ra05688h	porous carbon			koh	0.9	1841	1.05	2.25	0	0	1.78	1.39	17.14	0	0	0	0	187	185.555	0.00778973
10.1039/c5ra05688h	porous carbon			koh	0.9	1554	0.94	2.36	0	0	2.35	1.09	15.24	0	0	0	0	204	224.251	0.0903046
10.1039/c4ta00778f	porous carbon			h2so4	0.9	341	0.53	0	0.05	0	0	0	0	0	0	0	0	41	60.1783	0.318692
10.1039/c4ta00778f	porous carbon			h2so4	0.9	960	0.76	0	0.34	0	0	0	0	0	0	0	0	0	-22.5351	-
10.1039/c4ta00778f	porous carbon			h2so4	0.9	1028	1	0	0.34	0	0	0	0	0	0	0	0	0	-12.1212	-
10.1039/c4ta00778f	porous carbon			h2so4	0.9	982	0.6	0	0.39	0	0	0	0	0	0	0	0	0	18.8413	-
10.1039/c4ta00778f	porous carbon			h2so4	0.9	618	0.75	0	0.16	0	0	0	0	0	0	0	0	0	20.6421	-
10.1039/c4ta00778f	porous carbon			h2so4	0.9	634	0.75	0	0.16	0	0	0	0	0	0	0	0	0	25.3168	-
10.1039/c4ta00778f	porous carbon			h2so4	0.9	1247	1.19	0	0.42	0	0	0	0	0	0	0	0	0	-3.23562	-
10.1039/c4ta00778f	porous carbon			h2so4	0.9	1124	1.1	0	0.35	0	0	0	0	0	0	0	0	0	2.19737	-
10.1039/c4ta00778f	porous carbon			h2so4	0.9	1757	1.64	0	0.52	0	0	0	0	0	0	0	0	0	51.478	-
10.1039/c4ra06724j	porous carbon			h2so4	1	1161.6	2.78	21	0.25	0	0	0	0	0	0	0	0	257	256.803	0.000765905
10.1039/c4ra06724j	AC			h2so5	1	851	0.55	2	0.37	0	0	0	0	0	0	0	0	120	93.8113	0.279163
10.1039/c4ta01215a	N-doped carbon			koh	1	139	0	4.3	0	0	0.57	11.3	0	0	0	0	0	0	32.9957	-
10.1039/c4ta01215a	N-doped carbon			koh	1	1299	0	0	0	0	0.89	4.8	0	0	0	0	0	491	530.076	0.0737172
10.1039/c4ta01215a	N-doped carbon			koh	1	2090	0	0	0	0	0.9	4.1	0	0	0	0	0	525	461.911	0.136582
10.1039/c3nr00738c	porous carbon			BMINBF6	4	3023	2.18	1.2	0	0	0	0	0	0	0	0	0	213	234.743	0.0926232
10.1039/c3nr00738c	porous carbon			BMINBF6	4	408	0.37	0	0	0	0	0	0	0	0	0	0	0	4.85957	-
10.1039/c3ta10660h	carbon fiber				0	1050	1.015	0	0.118	0	0	0	0	0	0	0	0	0	-6.52173	-
10.1039/c3ta10660h	carbon fiber				0	529	0.296	0	0.195	0	0	0	0	0	0	0	0	0	-34.5921	-
10.1039/c3ta10660h	carbon fiber				0	1218	1.075	0	0.698	0	0	0	0	0	0	0	0	276	277.273	0.00459023
10.1039/c3ta10660h	carbon fiber				0	1144	0.666	0	0.551	0	0	0	0	0	0	0	0	0	15.4531	-
